# Supplementary material for: A Mechanistic Study on the Formation of Dronic Acids
Source: MDPI journal article supplement (doi:10.3390/molecules26247587), 2021-12-14
Supplement: s1 [file s1]

# Supplementary Materials:

## A Mechanistic Study on the Formation of Dronic Acids

Péter Ábrányi-Balogh <sup>1</sup>, István Greiner <sup>2</sup> and György Keglevich <sup>3,\*</sup>

<sup>1</sup> Medicinal Chemistry Research Group, Research Centre for Natural Sciences, 1117 Budapest, Hungary; abransyi-balogh.peter@ttk.mta.hu

<sup>2</sup> Gedeon Richter Plc. 1475 Budapest Hungary; i.greiner@richter.hu

<sup>3</sup> Department of Organic Chemistry and Technology, Budapest University of Technology and Economics, 1521 Budapest, Hungary

\* Correspondence: keglevich.gyorgy@vbk.bme.hu; Tel.: +36-1-463-1111 (ext. 5883)

### 1. The Best Synthetic Procedures for the Disodium Salt of Fenidronate and Benzidronate

#### 1.1. Preparation of the Disodium Salt of Fenidronate Starting from Benzoic Acid in a One Step Reaction (Scheme 1/Version A) [S1]

3.1 g (0.025 mol) of benzoic acid was added into 10.5 mL of MSA on stirring. Then 7.0 mL (0.08 mol) of phosphorus trichloride was added dropwise in *ca.* 30 min, and the contents of the flask were stirred at 75 °C for 24 h. After cooling the mixture to 26 °C, 25 mL (1.4 mol) of water was added and the mixture was stirred further at 105 °C for 4 h. The pH was adjusted to 1.8 by adding ~12 mL of 50% aqueous sodium hydroxide to the mixture. Then 127 mL of methanol was added, the mixture stirred for 45 min and the precipitate was removed by filtration. The crude product was dissolved in 10 mL of hot water and 50 mL of methanol was added, then the precipitate was filtered off and dried to give 13.3 g of fenidronate disodium salt (**4**) in a purity of *ca.* 67% (on the basis of <sup>31</sup>P NMR). The precipitation was repeated twice by adding 50 mL of methanol to the 10 mL water solution of the crude product. Then the solid product was suspended in the 50 mL mixture of methanol–water 94:6 and the mixture was digested by stirring at 65 °C for 30 min, then the solid product was filtered off. This procedure was repeated twice to afford 3.6 g (46%) of fenidronate disodium salt in a purity of 100%. <sup>31</sup>P NMR (D<sub>2</sub>O)  $\delta$ : 16.0,  $\delta$ [S2] 16.39, <sup>13</sup>C NMR (D<sub>2</sub>O)  $\delta$ : 136.9 (t, *J*=2.3, C<sub>1</sub>), 128.1 (t, *J*~2.1, C<sub>3</sub>\*), 127.4 (t, *J*~2.1, C<sub>4</sub>), 126.0 (t, *J*=4.4, C<sub>2</sub>\*), 76.5 (t, *J*=140.9, P–C–P), \*may be reversed.

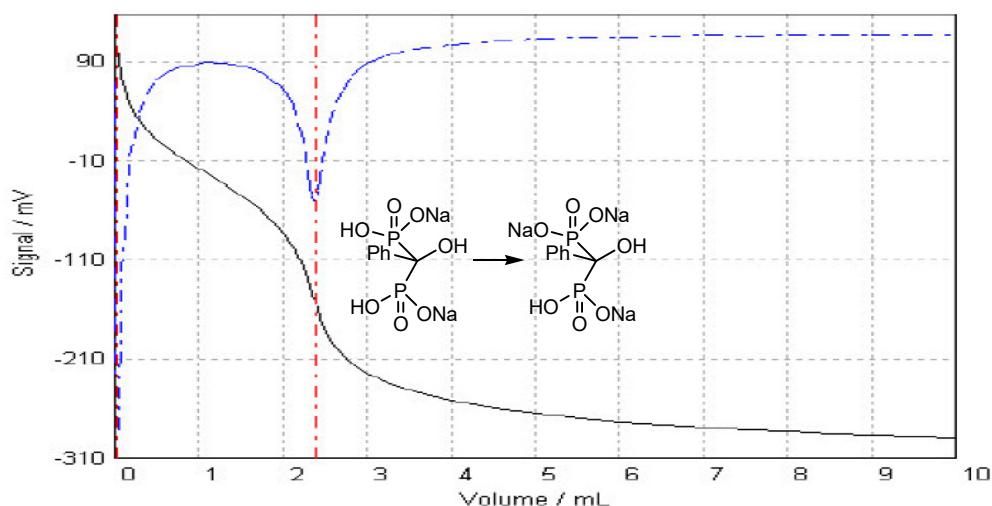

Titration curve for the disodium salt of fenidronic acid obtained by the reaction marked by Scheme 1/Version A.

1.2. Preparation of the Disodium Salt of Benzidronate Starting from Phenylacetic Acid, Phosphorus Trichloride and Phosphorous Acid in a One Step Reaction (Scheme 6/best experiment) [S3]

3.4 g (0.025 mol) of phenylacetic acid (**5**) and 2.1 g (0.025 mol) phosphorous acid were added into 10.5 mL of MSA on stirring. Then 6.6 mL (0.075 mol) of phosphorus trichloride was added dropwise in *ca.* 30 min, and the contents of the flask were stirred at 85 °C for 24 h. After cooling the mixture to 26 °C, 20 mL (1.1 mol) of water was added and the mixture was stirred further at 105 °C for 4 h. The pH was adjusted to 2.5 by adding ~13 mL of 50% aqueous sodium hydroxide to the mixture. Then, the mixture was stirred for 12 h and the precipitate was removed by filtration to give ~20 g of the crude product that was dissolved in 25 mL of hot water, then 100 mL of methanol was added, and the mixture was stirred for 1 h. The precipitate was filtered off and was suspended in 60 mL of methanol-water 94:6 and the mixture was digested by stirring at 65 °C for 30 min. The solid product was then filtered off to furnish 6.8 g (81%) of benzidronate disodium salt (**6**) in a purity of 98%. <sup>31</sup>P NMR (D<sub>2</sub>O) δ 17.8, δ[S4] 19.0, <sup>13</sup>C NMR (D<sub>2</sub>O) δ 38.4 (s, CH<sub>2</sub>), 74.3 (t, J=134.7, P-C-P), 126.7 (s, C<sub>4</sub>), 128.0 (s, C<sub>2</sub>\*), 131.5 (s, C<sub>3</sub>\*), 136.8 (t, J=7.9, C<sub>1</sub>), \*may be reversed.

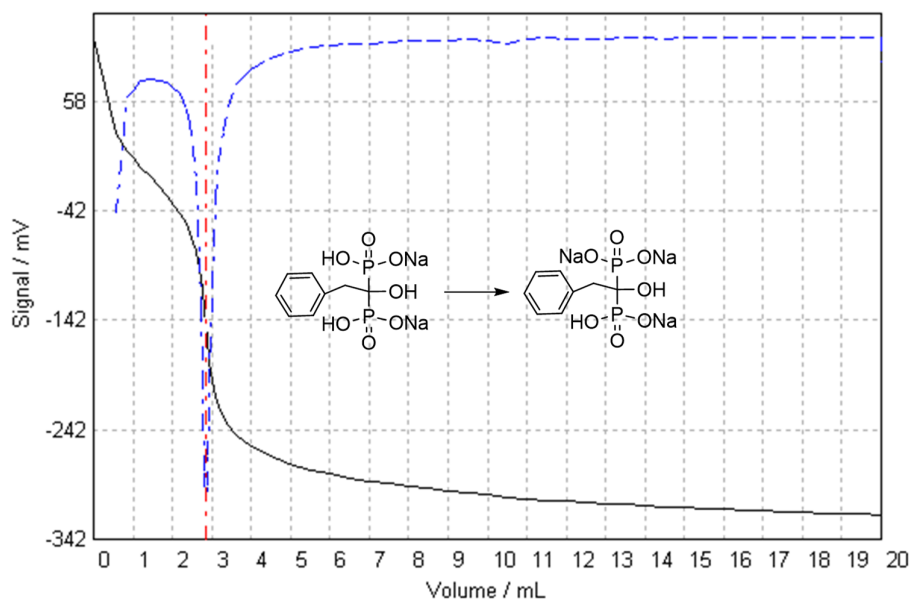

Titration curve for the disodium salt of benzidronic acid obtained by the reaction presented in Scheme 6/best experiment.

## References

- S1 Grün, A.; Kovács, R.; Nagy, D.I.; Garadnay, S.; Greiner, I.; Keglevich, G. The rational synthesis of Fenidronate. *Lett. Org. Chem.* **2014**, *11*, 368–373. doi:10.2174/1570178611666140124001516
- S2 Egorov, M.; Aoun, S.; Padrines, M.; Redini, F.; Heymann, D.; Lebreton, J.; Mathé-Allainmat, M. A one-pot synthesis of 1-hydroxy-1,1-bis(phosphonic acid)s starting from the corresponding carboxylic acids. *Eur. J. Org. Chem.* **2011**, 7148–7154. doi:10.1002/ejoc.201101094
- S3 Grün, A.; Kovács, R.; Nagy, D.I.; Garadnay, S.; Greiner, I.; Keglevich, G. Efficient synthesis of benzidronate applying of phosphorus trichloride and phosphorous acid. *Lett. Drug Des. Discov.* **2015**, *12*, 78–84, doi:10.2174/1570180811666141001004732
- S4 Agapkina, J.; Yanvarev, D.; Anisenko, A.; Korolev, S.; Vepsäläinen, J.; Kochetkov, S.; Gottikh, M. Specific features of HIV-1 integrase inhibition by bisphosphonate derivatives. *Eur. J. Med. Chem.* **2014**, *73*, 73–82. doi:10.1016/j.ejmech.2013.11.028

## 2.) Details of Theoretical Calculations

X, Y, Z Coordinates of the computed structures (columns are in this order). Solvents for those species that were used in MSA and in sulfolane as well, are indicated after the name of the molecule.

A1.log

Input orientation:

| Center<br>Number | Atomic<br>Number | Atomic<br>Type | Coordinates (Angstroms) |           |           |
|------------------|------------------|----------------|-------------------------|-----------|-----------|
|                  |                  |                | X                       | Y         | Z         |
| 1                | 6                | 0              | 3.571429                | -0.775783 | 0.865896  |
| 2                | 6                | 0              | 2.297430                | -1.188388 | 0.498460  |
| 3                | 6                | 0              | 1.547385                | -0.403721 | -0.380842 |
| 4                | 6                | 0              | 2.062012                | 0.791670  | -0.880636 |
| 5                | 6                | 0              | 3.342433                | 1.192763  | -0.513166 |
| 6                | 6                | 0              | 4.094294                | 0.413925  | 0.361148  |
| 7                | 1                | 0              | 4.157380                | -1.381297 | 1.546920  |
| 8                | 1                | 0              | 1.884776                | -2.112537 | 0.886049  |
| 9                | 1                | 0              | 1.471081                | 1.393961  | -1.560370 |
| 10               | 1                | 0              | 3.749793                | 2.115273  | -0.909169 |
| 11               | 1                | 0              | 5.088804                | 0.732315  | 0.650814  |
| 12               | 6                | 0              | 0.176164                | -0.842650 | -0.755111 |
| 13               | 8                | 0              | -0.554820               | 0.020977  | -1.644030 |
| 14               | 8                | 0              | 0.116064                | -2.176687 | -1.015704 |
| 15               | 1                | 0              | -0.778522               | -2.460579 | -1.255358 |
| 16               | 15               | 0              | -1.218494               | 0.078597  | -0.077321 |
| 17               | 17               | 0              | -3.126814               | -0.343563 | -0.605546 |
| 18               | 17               | 0              | -1.491794               | -0.399046 | 2.039403  |
| 19               | 17               | 0              | -1.048023               | 2.075120  | 0.207573  |

A10.log

Input orientation:

| Center<br>Number | Atomic<br>Number | Atomic<br>Type | Coordinates (Angstroms) |           |           |
|------------------|------------------|----------------|-------------------------|-----------|-----------|
|                  |                  |                | X                       | Y         | Z         |
| 1                | 6                | 0              | -3.122779               | -1.043078 | -1.335595 |
| 2                | 6                | 0              | -2.161270               | -0.077390 | -1.610967 |
| 3                | 6                | 0              | -1.858808               | 0.902728  | -0.663669 |
| 4                | 6                | 0              | -2.555421               | 0.926500  | 0.547232  |
| 5                | 6                | 0              | -3.512691               | -0.042585 | 0.824759  |
| 6                | 6                | 0              | -3.790808               | -1.033137 | -0.113689 |
| 7                | 1                | 0              | -3.350126               | -1.803023 | -2.073872 |
| 8                | 1                | 0              | -1.638674               | -0.082526 | -2.560956 |
| 9                | 1                | 0              | -2.343798               | 1.706459  | 1.270671  |
| 10               | 1                | 0              | -4.043185               | -0.021943 | 1.769428  |
| 11               | 1                | 0              | -4.535280               | -1.790909 | 0.101899  |
| 12               | 6                | 0              | 0.514157                | 1.670812  | -0.249213 |
| 13               | 8                | 0              | 1.447355                | 2.367236  | -0.095379 |
| 14               | 17               | 0              | 1.183033                | -0.762300 | -1.617311 |
| 15               | 6                | 0              | -0.800345               | 1.934720  | -0.937505 |

|    |    |   |           |           |           |
|----|----|---|-----------|-----------|-----------|
| 16 | 1  | 0 | -0.557168 | 2.001383  | -2.003058 |
| 17 | 1  | 0 | -1.094346 | 2.931852  | -0.596450 |
| 18 | 15 | 0 | 0.772243  | -0.155508 | 0.500463  |
| 19 | 17 | 0 | -0.285667 | -1.859636 | 0.844724  |
| 20 | 17 | 0 | 0.225773  | 0.676778  | 2.485171  |
| 21 | 17 | 0 | 2.710252  | -0.421576 | 1.042507  |

A10+H.log

Input orientation:

| Center<br>Number | Atomic<br>Number | Atomic<br>Type | Coordinates (Angstroms) |           |           |
|------------------|------------------|----------------|-------------------------|-----------|-----------|
|                  |                  |                | X                       | Y         | Z         |
| 1                | 6                | 0              | -3.243033               | 1.178666  | -0.388990 |
| 2                | 6                | 0              | -2.241668               | 1.239668  | 0.572991  |
| 3                | 6                | 0              | -1.707629               | 0.063403  | 1.102166  |
| 4                | 6                | 0              | -2.222442               | -1.172210 | 0.706342  |
| 5                | 6                | 0              | -3.223738               | -1.231132 | -0.256255 |
| 6                | 6                | 0              | -3.724699               | -0.057211 | -0.813552 |
| 7                | 1                | 0              | -3.649319               | 2.094131  | -0.802259 |
| 8                | 1                | 0              | -1.870619               | 2.200133  | 0.913753  |
| 9                | 1                | 0              | -1.834499               | -2.084511 | 1.146354  |
| 10               | 1                | 0              | -3.614185               | -2.192056 | -0.569400 |
| 11               | 1                | 0              | -4.502411               | -0.105523 | -1.567033 |
| 12               | 6                | 0              | 0.781245                | 0.132885  | 1.562188  |
| 13               | 8                | 0              | 1.725881                | 0.224685  | 2.376500  |
| 14               | 17               | 0              | 0.911946                | 2.133345  | -0.256581 |
| 15               | 6                | 0              | -0.594903               | 0.132705  | 2.113084  |
| 16               | 1                | 0              | -0.645763               | 1.036993  | 2.735116  |
| 17               | 1                | 0              | -0.609604               | -0.716925 | 2.811300  |
| 18               | 15               | 0              | 1.081920                | -0.017219 | -0.297306 |
| 19               | 17               | 0              | -0.147995               | -0.177413 | -1.890683 |
| 20               | 17               | 0              | 0.988699                | -2.138735 | 0.108392  |
| 21               | 17               | 0              | 3.017801                | -0.035559 | -0.835576 |
| 22               | 1                | 0              | 2.654095                | 0.220055  | 2.057542  |

A11.log

Input orientation:

| Center<br>Number | Atomic<br>Number | Atomic<br>Type | Coordinates (Angstroms) |           |           |
|------------------|------------------|----------------|-------------------------|-----------|-----------|
|                  |                  |                | X                       | Y         | Z         |
| 1                | 6                | 0              | 3.900928                | -0.053812 | 1.261611  |
| 2                | 6                | 0              | 3.134937                | 0.753577  | 0.422140  |
| 3                | 6                | 0              | 2.772299                | 0.299045  | -0.843819 |
| 4                | 6                | 0              | 3.194851                | -0.960247 | -1.275312 |
| 5                | 6                | 0              | 3.967221                | -1.759426 | -0.443470 |
| 6                | 6                | 0              | 4.314195                | -1.309579 | 0.830608  |
| 7                | 1                | 0              | 4.177434                | 0.302598  | 2.246935  |
| 8                | 1                | 0              | 2.822026                | 1.740766  | 0.749721  |
| 9                | 1                | 0              | 2.907298                | -1.310607 | -2.261429 |

|    |    |   |           |           |           |
|----|----|---|-----------|-----------|-----------|
| 10 | 1  | 0 | 4.295328  | -2.734637 | -0.783598 |
| 11 | 1  | 0 | 4.913127  | -1.936354 | 1.481204  |
| 12 | 6  | 0 | 0.453721  | 0.672690  | -1.622860 |
| 13 | 8  | 0 | -0.327185 | 0.366789  | -2.450315 |
| 14 | 17 | 0 | -0.537510 | 2.761279  | 0.082160  |
| 15 | 6  | 0 | 1.880716  | 1.127691  | -1.736059 |
| 16 | 1  | 0 | 1.905697  | 2.183109  | -1.451287 |
| 17 | 1  | 0 | 2.142402  | 1.032317  | -2.791369 |
| 18 | 15 | 0 | -0.342813 | 0.543847  | 0.180981  |
| 19 | 17 | 0 | 0.145885  | 0.643326  | 2.163625  |
| 20 | 17 | 0 | 0.063653  | -1.619779 | 0.144727  |
| 21 | 8  | 0 | -1.939500 | 0.438031  | 0.016669  |
| 22 | 16 | 0 | -3.151729 | -0.708391 | -0.134424 |
| 23 | 8  | 0 | -2.771746 | -1.634582 | -1.168292 |
| 24 | 8  | 0 | -4.310802 | 0.125849  | -0.321804 |
| 25 | 6  | 0 | -3.153424 | -1.435707 | 1.471526  |
| 26 | 1  | 0 | -3.248442 | -0.627218 | 2.196057  |
| 27 | 1  | 0 | -4.026524 | -2.090269 | 1.498773  |
| 28 | 1  | 0 | -2.234195 | -2.004669 | 1.597659  |

-----

A11+H.log

Input orientation:

| Center<br>Number | Atomic<br>Number | Atomic<br>Type | Coordinates (Angstroms) |           |           |
|------------------|------------------|----------------|-------------------------|-----------|-----------|
|                  |                  |                | X                       | Y         | Z         |
| 1                | 6                | 0              | -4.001677               | 0.456248  | -1.194119 |
| 2                | 6                | 0              | -3.243589               | 1.011451  | -0.169916 |
| 3                | 6                | 0              | -2.726043               | 0.196698  | 0.838949  |
| 4                | 6                | 0              | -3.015620               | -1.168108 | 0.843391  |
| 5                | 6                | 0              | -3.775592               | -1.721843 | -0.181253 |
| 6                | 6                | 0              | -4.256720               | -0.912784 | -1.207507 |
| 7                | 1                | 0              | -4.393807               | 1.091649  | -1.979468 |
| 8                | 1                | 0              | -3.048282               | 2.078020  | -0.151940 |
| 9                | 1                | 0              | -2.644038               | -1.796194 | 1.645703  |
| 10               | 1                | 0              | -3.991626               | -2.783509 | -0.178808 |
| 11               | 1                | 0              | -4.842664               | -1.346169 | -2.009635 |
| 12               | 6                | 0              | -0.416555               | 0.894683  | 1.571790  |
| 13               | 8                | 0              | 0.331173                | 1.498210  | 2.373869  |
| 14               | 17               | 0              | -0.096663               | 2.103058  | -0.813098 |
| 15               | 6                | 0              | -1.854543               | 0.795743  | 1.911610  |
| 16               | 1                | 0              | -2.157852               | 1.814449  | 2.184199  |
| 17               | 1                | 0              | -1.879801               | 0.211348  | 2.842870  |
| 18               | 15               | 0              | 0.303782                | 0.147103  | 0.010956  |
| 19               | 17               | 0              | -0.541447               | -0.794318 | -1.561720 |
| 20               | 17               | 0              | 0.372943                | -1.667962 | 1.183889  |
| 21               | 8                | 0              | 1.863571                | 0.382691  | -0.098473 |
| 22               | 16               | 0              | 3.341129                | -0.517511 | -0.011124 |
| 23               | 8                | 0              | 3.423363                | -1.046399 | 1.319311  |
| 24               | 8                | 0              | 4.273660                | 0.472516  | -0.464518 |
| 25               | 6                | 0              | 3.041711                | -1.752827 | -1.230469 |
| 26               | 1                | 0              | 2.772393                | -1.245463 | -2.156680 |
| 27               | 1                | 0              | 3.987976                | -2.287857 | -1.340174 |

|    |   |   |          |           |           |
|----|---|---|----------|-----------|-----------|
| 28 | 1 | 0 | 2.265355 | -2.424134 | -0.864111 |
| 29 | 1 | 0 | 1.288856 | 1.582181  | 2.168934  |

A12.log

Input orientation:

| Center<br>Number | Atomic<br>Number | Atomic<br>Type | Coordinates (Angstroms) |           |           |
|------------------|------------------|----------------|-------------------------|-----------|-----------|
|                  |                  |                | X                       | Y         | Z         |
| 1                | 6                | 0              | 4.558777                | -0.887043 | 1.104730  |
| 2                | 6                | 0              | 3.212205                | -0.677764 | 0.828853  |
| 3                | 6                | 0              | 2.811804                | -0.256022 | -0.440495 |
| 4                | 6                | 0              | 3.771349                | -0.041013 | -1.427321 |
| 5                | 6                | 0              | 5.120684                | -0.251509 | -1.151089 |
| 6                | 6                | 0              | 5.515996                | -0.675040 | 0.113964  |
| 7                | 1                | 0              | 4.861679                | -1.217890 | 2.091718  |
| 8                | 1                | 0              | 2.461996                | -0.841787 | 1.597106  |
| 9                | 1                | 0              | 3.462198                | 0.287056  | -2.414408 |
| 10               | 1                | 0              | 5.861236                | -0.086621 | -1.925568 |
| 11               | 1                | 0              | 6.565605                | -0.841490 | 0.328323  |
| 12               | 6                | 0              | 0.833997                | 1.229059  | -0.088854 |
| 13               | 8                | 0              | 1.436873                | 2.096599  | 0.466337  |
| 14               | 17               | 0              | -0.413278               | -0.536238 | 2.406355  |
| 15               | 15               | 0              | -2.818737               | -0.774097 | -1.325482 |
| 16               | 17               | 0              | -3.910827               | -0.595074 | 0.422797  |
| 17               | 17               | 0              | -1.627269               | -2.395195 | -0.837382 |
| 18               | 8                | 0              | -1.684778               | 0.429805  | -1.071048 |
| 19               | 15               | 0              | -1.029093               | 1.551832  | -0.171984 |
| 20               | 8                | 0              | -1.319893               | 2.940011  | -0.839600 |
| 21               | 1                | 0              | -1.028273               | 3.067905  | -1.760179 |
| 22               | 8                | 0              | -1.648602               | 1.665018  | 1.224065  |
| 23               | 1                | 0              | -1.285279               | 0.864261  | 1.838388  |
| 24               | 6                | 0              | 1.351335                | -0.027441 | -0.720658 |
| 25               | 1                | 0              | 0.737957                | -0.852864 | -0.342674 |
| 26               | 1                | 0              | 1.147276                | 0.052542  | -1.796230 |

A2.log

Input orientation:

| Center<br>Number | Atomic<br>Number | Atomic<br>Type | Coordinates (Angstroms) |           |           |
|------------------|------------------|----------------|-------------------------|-----------|-----------|
|                  |                  |                | X                       | Y         | Z         |
| 1                | 6                | 0              | -4.544992               | 0.166405  | -0.765176 |
| 2                | 6                | 0              | -3.218796               | 0.144299  | -1.177371 |
| 3                | 6                | 0              | -2.262581               | -0.495632 | -0.385710 |
| 4                | 6                | 0              | -2.626688               | -1.099955 | 0.815953  |
| 5                | 6                | 0              | -3.959209               | -1.080795 | 1.216594  |
| 6                | 6                | 0              | -4.916110               | -0.446673 | 0.430457  |
| 7                | 1                | 0              | -5.289812               | 0.662322  | -1.376010 |
| 8                | 1                | 0              | -2.922814               | 0.618804  | -2.105805 |
| 9                | 1                | 0              | -1.876877               | -1.590284 | 1.425397  |

|    |    |   |           |           |           |
|----|----|---|-----------|-----------|-----------|
| 10 | 1  | 0 | -4.247221 | -1.560736 | 2.144255  |
| 11 | 1  | 0 | -5.952034 | -0.428624 | 0.748424  |
| 12 | 6  | 0 | -0.840227 | -0.501483 | -0.828186 |
| 13 | 8  | 0 | 0.098421  | -1.160404 | 0.041513  |
| 14 | 8  | 0 | -0.720527 | -0.770710 | -2.161394 |
| 15 | 1  | 0 | 0.206662  | -0.802263 | -2.442352 |
| 16 | 15 | 0 | 0.341088  | 0.529721  | 0.045984  |
| 17 | 17 | 0 | 0.205548  | 2.589759  | -0.566829 |
| 18 | 17 | 0 | 0.078512  | 0.853065  | 2.021468  |
| 19 | 8  | 0 | 1.921088  | 0.514919  | -0.318371 |
| 20 | 16 | 0 | 2.995175  | -0.737505 | -0.028322 |
| 21 | 8  | 0 | 2.733408  | -1.217202 | 1.308773  |
| 22 | 8  | 0 | 2.896492  | -1.645665 | -1.144311 |
| 23 | 6  | 0 | 4.462916  | 0.227238  | -0.107768 |
| 24 | 1  | 0 | 5.284752  | -0.468696 | 0.068978  |
| 25 | 1  | 0 | 4.524038  | 0.663259  | -1.103597 |
| 26 | 1  | 0 | 4.408227  | 0.984551  | 0.672798  |

A3.log

Input orientation:

| Center<br>Number | Atomic<br>Number | Atomic<br>Type | Coordinates (Angstroms) |           |           |
|------------------|------------------|----------------|-------------------------|-----------|-----------|
|                  |                  |                | X                       | Y         | Z         |
| 1                | 6                | 0              | -4.124996               | -0.719430 | -0.041942 |
| 2                | 6                | 0              | -2.857162               | -1.273697 | -0.107652 |
| 3                | 6                | 0              | -1.739834               | -0.431578 | -0.045092 |
| 4                | 6                | 0              | -1.887725               | 0.949368  | 0.084009  |
| 5                | 6                | 0              | -3.161399               | 1.494489  | 0.146857  |
| 6                | 6                | 0              | -4.275505               | 0.660954  | 0.084486  |
| 7                | 1                | 0              | -4.996372               | -1.360876 | -0.086731 |
| 8                | 1                | 0              | -2.717824               | -2.343548 | -0.205384 |
| 9                | 1                | 0              | -1.035460               | 1.618054  | 0.131183  |
| 10               | 1                | 0              | -3.284132               | 2.565688  | 0.243676  |
| 11               | 1                | 0              | -5.269306               | 1.090167  | 0.134766  |
| 12               | 6                | 0              | -0.427144               | -1.072280 | -0.124883 |
| 13               | 8                | 0              | -0.144185               | -2.213898 | -0.262027 |
| 14               | 17               | 0              | 0.955063                | 0.379441  | -2.178201 |
| 15               | 15               | 0              | 1.184916                | 0.055585  | 0.008324  |
| 16               | 17               | 0              | 1.038716                | -0.243091 | 2.199995  |
| 17               | 17               | 0              | 2.825064                | -1.101454 | -0.190051 |
| 18               | 17               | 0              | 1.741476                | 2.003985  | 0.272913  |

A3+H.log

Input orientation:

| Center<br>Number | Atomic<br>Number | Atomic<br>Type | Coordinates (Angstroms) |          |           |
|------------------|------------------|----------------|-------------------------|----------|-----------|
|                  |                  |                | X                       | Y        | Z         |
| 1                | 6                | 0              | 1.688827                | 3.148455 | -0.810473 |
| 2                | 6                | 0              | 0.990790                | 2.042902 | -1.247942 |

|    |    |   |           |           |           |
|----|----|---|-----------|-----------|-----------|
| 3  | 6  | 0 | 0.009158  | 1.467943  | -0.408326 |
| 4  | 6  | 0 | -0.251750 | 2.015539  | 0.864986  |
| 5  | 6  | 0 | 0.464129  | 3.114078  | 1.291040  |
| 6  | 6  | 0 | 1.427434  | 3.680297  | 0.453847  |
| 7  | 1  | 0 | 2.435791  | 3.602703  | -1.448441 |
| 8  | 1  | 0 | 1.174051  | 1.623842  | -2.228935 |
| 9  | 1  | 0 | -0.973780 | 1.578912  | 1.543799  |
| 10 | 1  | 0 | 0.280231  | 3.530463  | 2.272505  |
| 11 | 1  | 0 | 1.983239  | 4.546634  | 0.793326  |
| 12 | 6  | 0 | -0.683474 | 0.322855  | -0.882054 |
| 13 | 8  | 0 | -0.268746 | -0.263265 | -1.930524 |
| 14 | 17 | 0 | -0.867525 | -1.455104 | 1.203419  |
| 15 | 15 | 0 | -2.240009 | -0.339371 | -0.032815 |
| 16 | 17 | 0 | -3.279039 | 1.100868  | -1.270643 |
| 17 | 17 | 0 | -3.001520 | -1.951307 | -0.958765 |
| 18 | 17 | 0 | -3.343511 | 0.202502  | 1.584513  |
| 19 | 1  | 0 | -0.769657 | -1.021019 | -2.293625 |

A4.log

Input orientation:

| Center<br>Number | Atomic<br>Number | Atomic<br>Type | Coordinates (Angstroms) |           |           |
|------------------|------------------|----------------|-------------------------|-----------|-----------|
|                  |                  |                | X                       | Y         | Z         |
| 1                | 6                | 0              | -4.227450               | 0.805133  | -0.571227 |
| 2                | 6                | 0              | -2.872957               | 0.638301  | -0.322158 |
| 3                | 6                | 0              | -2.405028               | -0.600388 | 0.117613  |
| 4                | 6                | 0              | -3.281394               | -1.675860 | 0.306454  |
| 5                | 6                | 0              | -4.631821               | -1.500371 | 0.051755  |
| 6                | 6                | 0              | -5.102406               | -0.262211 | -0.384966 |
| 7                | 1                | 0              | -4.598189               | 1.763853  | -0.910721 |
| 8                | 1                | 0              | -2.207606               | 1.481453  | -0.474024 |
| 9                | 1                | 0              | -2.895546               | -2.628855 | 0.647837  |
| 10               | 1                | 0              | -5.319774               | -2.324696 | 0.192342  |
| 11               | 1                | 0              | -6.159700               | -0.128380 | -0.581825 |
| 12               | 6                | 0              | -0.989868               | -0.833909 | 0.405074  |
| 13               | 8                | 0              | -0.451297               | -1.812431 | 0.810669  |
| 14               | 17               | 0              | -0.146083               | 1.269056  | 2.157723  |
| 15               | 15               | 0              | 0.310784                | 0.585761  | 0.117148  |
| 16               | 17               | 0              | 0.439107                | -0.167909 | -1.966677 |
| 17               | 17               | 0              | 0.445041                | 2.512855  | -0.551623 |
| 18               | 8                | 0              | 1.746936                | 0.075798  | 0.605068  |
| 19               | 16               | 0              | 3.057132                | -0.834052 | 0.068994  |
| 20               | 8                | 0              | 3.839000                | -0.939828 | 1.272278  |
| 21               | 8                | 0              | 2.549393                | -2.024977 | -0.557270 |
| 22               | 6                | 0              | 3.800317                | 0.283356  | -1.071592 |
| 23               | 1                | 0              | 4.753171                | -0.169184 | -1.352711 |
| 24               | 1                | 0              | 3.144382                | 0.385543  | -1.934399 |
| 25               | 1                | 0              | 3.951674                | 1.227851  | -0.549467 |

A4+H.log



Input orientation:

| Center<br>Number | Atomic<br>Number | Atomic<br>Type | Coordinates (Angstroms) |           |           |
|------------------|------------------|----------------|-------------------------|-----------|-----------|
|                  |                  |                | X                       | Y         | Z         |
| 1                | 6                | 0              | 2.119344                | -3.297033 | 0.338557  |
| 2                | 6                | 0              | 1.002989                | -2.487847 | 0.332954  |
| 3                | 6                | 0              | 0.829187                | -1.550487 | -0.707927 |
| 4                | 6                | 0              | 1.792295                | -1.442149 | -1.738874 |
| 5                | 6                | 0              | 2.907708                | -2.251050 | -1.711572 |
| 6                | 6                | 0              | 3.069515                | -3.175827 | -0.677305 |
| 7                | 1                | 0              | 2.258118                | -4.019280 | 1.131959  |
| 8                | 1                | 0              | 0.286810                | -2.589307 | 1.137533  |
| 9                | 1                | 0              | 1.649251                | -0.723918 | -2.535724 |
| 10               | 1                | 0              | 3.652992                | -2.170711 | -2.492264 |
| 11               | 1                | 0              | 3.948391                | -3.809859 | -0.661553 |
| 12               | 6                | 0              | -0.307140               | -0.701790 | -0.775915 |
| 13               | 8                | 0              | -0.418310               | 0.117800  | -1.738579 |
| 14               | 17               | 0              | -0.296522               | 0.252978  | 1.855074  |
| 15               | 15               | 0              | -1.693321               | -0.668408 | 0.515664  |
| 16               | 17               | 0              | -2.867423               | -1.679265 | -1.023047 |
| 17               | 17               | 0              | -2.248878               | -2.045571 | 1.885078  |
| 18               | 8                | 0              | -2.582125               | 0.656751  | 0.525736  |
| 19               | 16               | 0              | -3.453112               | 1.630451  | -0.551867 |
| 20               | 8                | 0              | -3.399419               | 2.917197  | 0.070944  |
| 21               | 8                | 0              | -2.790352               | 1.410937  | -1.824448 |
| 22               | 6                | 0              | -5.065224               | 0.931780  | -0.469673 |
| 23               | 1                | 0              | -5.714032               | 1.634177  | -0.997282 |
| 24               | 1                | 0              | -5.049105               | -0.040958 | -0.955229 |
| 25               | 1                | 0              | -5.326325               | 0.869863  | 0.587314  |
| 26               | 1                | 0              | -1.257832               | 0.642657  | -1.843752 |

A5.log

Input orientation:

| Center<br>Number | Atomic<br>Number | Atomic<br>Type | Coordinates (Angstroms) |           |           |
|------------------|------------------|----------------|-------------------------|-----------|-----------|
|                  |                  |                | X                       | Y         | Z         |
| 1                | 6                | 0              | -3.338686               | -1.787711 | 1.000613  |
| 2                | 6                | 0              | -2.005793               | -1.490430 | 0.752210  |
| 3                | 6                | 0              | -1.680192               | -0.631746 | -0.299147 |
| 4                | 6                | 0              | -2.672337               | -0.071825 | -1.098800 |
| 5                | 6                | 0              | -4.004591               | -0.389634 | -0.853184 |
| 6                | 6                | 0              | -4.337617               | -1.240480 | 0.196093  |
| 7                | 1                | 0              | -3.599323               | -2.448547 | 1.818462  |
| 8                | 1                | 0              | -1.219574               | -1.919121 | 1.365217  |
| 9                | 1                | 0              | -2.404493               | 0.598271  | -1.907206 |
| 10               | 1                | 0              | -4.781190               | 0.032304  | -1.479584 |
| 11               | 1                | 0              | -5.376908               | -1.478938 | 0.389624  |
| 12               | 6                | 0              | -0.247650               | -0.320026 | -0.556315 |
| 13               | 8                | 0              | 0.028532                | 0.647088  | -1.581152 |
| 14               | 8                | 0              | 0.445748                | -1.526296 | -0.710194 |
| 15               | 16               | 0              | 2.003979                | -1.753369 | -0.267106 |

|    |    |   |           |           |           |
|----|----|---|-----------|-----------|-----------|
| 16 | 8  | 0 | 2.625761  | -0.440950 | -0.261508 |
| 17 | 8  | 0 | 2.492621  | -2.768657 | -1.166251 |
| 18 | 6  | 0 | 1.823688  | -2.383343 | 1.368015  |
| 19 | 1  | 0 | 2.831906  | -2.538753 | 1.755334  |
| 20 | 1  | 0 | 1.285498  | -1.639989 | 1.956021  |
| 21 | 1  | 0 | 1.274728  | -3.322071 | 1.301430  |
| 22 | 15 | 0 | 0.457169  | 1.281022  | -0.089944 |
| 23 | 17 | 0 | -1.064938 | 2.587737  | 0.208596  |
| 24 | 17 | 0 | 1.146223  | 1.235513  | 1.941717  |
| 25 | 17 | 0 | 1.986589  | 2.434151  | -0.784003 |

A6.log

Input orientation:

| Center<br>Number | Atomic<br>Number | Atomic<br>Type | Coordinates (Angstroms) |           |           |
|------------------|------------------|----------------|-------------------------|-----------|-----------|
|                  |                  |                | X                       | Y         | Z         |
| 1                | 6                | 0              | 4.570371                | -0.329171 | 0.166991  |
| 2                | 6                | 0              | 3.296226                | 0.220155  | 0.200334  |
| 3                | 6                | 0              | 2.258486                | -0.413460 | -0.485903 |
| 4                | 6                | 0              | 2.483371                | -1.587845 | -1.197387 |
| 5                | 6                | 0              | 3.767298                | -2.123254 | -1.237501 |
| 6                | 6                | 0              | 4.806479                | -1.499177 | -0.554192 |
| 7                | 1                | 0              | 5.380056                | 0.155161  | 0.699480  |
| 8                | 1                | 0              | 3.099960                | 1.134215  | 0.751894  |
| 9                | 1                | 0              | 1.665564                | -2.073117 | -1.717230 |
| 10               | 1                | 0              | 3.953269                | -3.031206 | -1.798514 |
| 11               | 1                | 0              | 5.803218                | -1.923496 | -0.582673 |
| 12               | 6                | 0              | 0.895805                | 0.185748  | -0.429458 |
| 13               | 8                | 0              | -0.162220               | -0.549564 | -1.061404 |
| 14               | 8                | 0              | 0.988497                | 1.523051  | -0.836059 |
| 15               | 16               | 0              | -0.005471               | 2.711842  | -0.313927 |
| 16               | 8                | 0              | -1.209744               | 2.058996  | 0.168589  |
| 17               | 8                | 0              | -0.088566               | 3.630010  | -1.422556 |
| 18               | 6                | 0              | 0.925822                | 3.404980  | 1.012399  |
| 19               | 1                | 0              | 0.327038                | 4.220967  | 1.420705  |
| 20               | 1                | 0              | 1.085045                | 2.625024  | 1.756240  |
| 21               | 1                | 0              | 1.865199                | 3.770805  | 0.599160  |
| 22               | 15               | 0              | -0.387960               | -0.545329 | 0.607244  |
| 23               | 17               | 0              | 0.111276                | -2.452598 | 1.056348  |
| 24               | 17               | 0              | -0.304424               | 0.239418  | 2.577289  |
| 25               | 8                | 0              | -2.012400               | -0.492897 | 0.628309  |
| 26               | 16               | 0              | -3.081917               | -1.018257 | -0.539364 |
| 27               | 8                | 0              | -2.502797               | -2.186683 | -1.159776 |
| 28               | 8                | 0              | -4.311829               | -1.139950 | 0.201795  |
| 29               | 6                | 0              | -3.138011               | 0.356054  | -1.637649 |
| 30               | 1                | 0              | -3.890082               | 0.100279  | -2.386333 |
| 31               | 1                | 0              | -3.436594               | 1.228253  | -1.058865 |
| 32               | 1                | 0              | -2.154163               | 0.471884  | -2.088686 |

A7.log

Input orientation:

| Center<br>Number | Atomic<br>Number | Atomic<br>Type | Coordinates (Angstroms) |           |           |
|------------------|------------------|----------------|-------------------------|-----------|-----------|
|                  |                  |                | X                       | Y         | Z         |
| 1                | 6                | 0              | -4.442686               | 0.413779  | -0.219493 |
| 2                | 6                | 0              | -3.155867               | 0.931333  | -0.328058 |
| 3                | 6                | 0              | -2.077782               | 0.061300  | -0.476616 |
| 4                | 6                | 0              | -2.280132               | -1.319693 | -0.501085 |
| 5                | 6                | 0              | -3.569382               | -1.827761 | -0.383270 |
| 6                | 6                | 0              | -4.650404               | -0.962175 | -0.242441 |
| 7                | 1                | 0              | -5.282751               | 1.089949  | -0.113660 |
| 8                | 1                | 0              | -2.993178               | 2.001472  | -0.304442 |
| 9                | 1                | 0              | -1.442249               | -1.999426 | -0.621178 |
| 10               | 1                | 0              | -3.727384               | -2.899348 | -0.406525 |
| 11               | 1                | 0              | -5.654297               | -1.360469 | -0.151690 |
| 12               | 6                | 0              | -0.666753               | 0.599243  | -0.512422 |
| 13               | 8                | 0              | 0.162999                | -0.186157 | -1.304056 |
| 14               | 8                | 0              | -0.651201               | 1.937770  | -0.849538 |
| 15               | 1                | 0              | 0.207271                | 2.164144  | -1.235296 |
| 16               | 15               | 0              | 1.761053                | -0.684710 | -0.839000 |
| 17               | 17               | 0              | 4.020825                | -1.459205 | 0.165413  |
| 18               | 17               | 0              | 2.560699                | 1.300729  | -0.945143 |
| 19               | 8                | 0              | 1.298428                | -0.590861 | 0.824262  |
| 20               | 15               | 0              | 0.095300                | 0.347886  | 1.211511  |
| 21               | 8                | 0              | -0.789245               | -0.319467 | 2.307952  |
| 22               | 1                | 0              | -1.359683               | -1.061620 | 2.031035  |
| 23               | 8                | 0              | 0.559391                | 1.638345  | 1.958153  |
| 24               | 1                | 0              | 1.166171                | 2.243776  | 1.494441  |

A8.log

Input orientation:

| Center<br>Number | Atomic<br>Number | Atomic<br>Type | Coordinates (Angstroms) |           |           |
|------------------|------------------|----------------|-------------------------|-----------|-----------|
|                  |                  |                | X                       | Y         | Z         |
| 1                | 6                | 0              | -4.003213               | 0.405129  | 1.099152  |
| 2                | 6                | 0              | -2.658408               | 0.291435  | 0.776433  |
| 3                | 6                | 0              | -2.279269               | -0.495421 | -0.311734 |
| 4                | 6                | 0              | -3.237960               | -1.167054 | -1.079738 |
| 5                | 6                | 0              | -4.579098               | -1.039523 | -0.754828 |
| 6                | 6                | 0              | -4.960211               | -0.254621 | 0.332414  |
| 7                | 1                | 0              | -4.302264               | 1.005048  | 1.949629  |
| 8                | 1                | 0              | -1.925927               | 0.792877  | 1.397262  |
| 9                | 1                | 0              | -2.926441               | -1.771218 | -1.923336 |
| 10               | 1                | 0              | -5.328702               | -1.548966 | -1.348176 |
| 11               | 1                | 0              | -6.010010               | -0.159390 | 0.585217  |
| 12               | 6                | 0              | -0.876033               | -0.670991 | -0.706323 |
| 13               | 8                | 0              | -0.410623               | -1.449854 | -1.469977 |
| 14               | 17               | 0              | 0.540201                | -1.079461 | 1.728455  |
| 15               | 15               | 0              | 0.486406                | 0.555554  | -0.059931 |
| 16               | 17               | 0              | 0.089349                | 1.891708  | -1.676542 |
| 17               | 17               | 0              | 0.519199                | 2.018211  | 1.362164  |

|    |    |   |          |           |           |
|----|----|---|----------|-----------|-----------|
| 18 | 8  | 0 | 1.914422 | 0.154235  | -0.517606 |
| 19 | 15 | 0 | 3.351748 | -0.494631 | 0.306838  |
| 20 | 8  | 0 | 3.075256 | -2.061014 | 0.044597  |
| 21 | 1  | 0 | 2.453498 | -2.431461 | 0.690341  |
| 22 | 8  | 0 | 4.329113 | -0.328483 | -0.964311 |
| 23 | 1  | 0 | 4.836570 | 0.496432  | -0.941269 |

A9.log

Input orientation:

| Center<br>Number | Atomic<br>Number | Atomic<br>Type | Coordinates (Angstroms) |           |           |
|------------------|------------------|----------------|-------------------------|-----------|-----------|
|                  |                  |                | X                       | Y         | Z         |
| 1                | 6                | 0              | -3.845541               | 1.167364  | -0.147075 |
| 2                | 6                | 0              | -2.627692               | 0.650836  | -0.572782 |
| 3                | 6                | 0              | -2.201800               | -0.596765 | -0.106955 |
| 4                | 6                | 0              | -3.000348               | -1.321698 | 0.786516  |
| 5                | 6                | 0              | -4.208145               | -0.796654 | 1.215208  |
| 6                | 6                | 0              | -4.630783               | 0.448346  | 0.748400  |
| 7                | 1                | 0              | -4.176879               | 2.131964  | -0.511808 |
| 8                | 1                | 0              | -2.034071               | 1.237543  | -1.263627 |
| 9                | 1                | 0              | -2.660225               | -2.287074 | 1.141878  |
| 10               | 1                | 0              | -4.822076               | -1.352811 | 1.913436  |
| 11               | 1                | 0              | -5.575710               | 0.858457  | 1.086372  |
| 12               | 6                | 0              | -0.923360               | -1.212740 | -0.523503 |
| 13               | 8                | 0              | -0.603097               | -2.349133 | -0.291885 |
| 14               | 17               | 0              | 3.160113                | -2.345192 | 0.848239  |
| 15               | 15               | 0              | 0.855562                | 2.036114  | 0.492875  |
| 16               | 17               | 0              | 2.919221                | 1.884963  | 0.280294  |
| 17               | 17               | 0              | 0.552171                | 0.476292  | 1.863356  |
| 18               | 8                | 0              | 0.368600                | 1.264686  | -0.872597 |
| 19               | 15               | 0              | 0.401251                | -0.251325 | -1.463963 |
| 20               | 8                | 0              | -0.048927               | -0.045559 | -2.966998 |
| 21               | 1                | 0              | -0.882969               | 0.423871  | -3.137025 |
| 22               | 8                | 0              | 1.719782                | -0.906194 | -1.373499 |
| 23               | 1                | 0              | 2.494372                | -1.710435 | -0.097029 |

BA1.log

Input orientation:

| Center<br>Number | Atomic<br>Number | Atomic<br>Type | Coordinates (Angstroms) |           |           |
|------------------|------------------|----------------|-------------------------|-----------|-----------|
|                  |                  |                | X                       | Y         | Z         |
| 1                | 6                | 0              | 1.353029                | -3.757509 | -0.270811 |
| 2                | 6                | 0              | 1.033718                | -2.714301 | 0.585248  |
| 3                | 6                | 0              | 0.448940                | -1.553455 | 0.067454  |
| 4                | 6                | 0              | 0.200999                | -1.441487 | -1.308259 |
| 5                | 6                | 0              | 0.521244                | -2.493814 | -2.150215 |
| 6                | 6                | 0              | 1.097088                | -3.649941 | -1.633646 |
| 7                | 1                | 0              | 1.806505                | -4.655923 | 0.128657  |
| 8                | 1                | 0              | 1.234857                | -2.799763 | 1.644506  |

|    |    |   |           |           |           |
|----|----|---|-----------|-----------|-----------|
| 9  | 1  | 0 | -0.235402 | -0.552020 | -1.744203 |
| 10 | 1  | 0 | 0.321470  | -2.405578 | -3.210627 |
| 11 | 1  | 0 | 1.349211  | -4.467126 | -2.298980 |
| 12 | 6  | 0 | 0.135498  | -0.436469 | 1.024361  |
| 13 | 8  | 0 | 0.443153  | -0.760948 | 2.290901  |
| 14 | 17 | 0 | -1.204815 | 1.755541  | -0.483221 |
| 15 | 15 | 0 | -1.766209 | 0.030909  | 0.802987  |
| 16 | 17 | 0 | -2.249732 | -1.711732 | 1.974455  |
| 17 | 17 | 0 | -2.625415 | 1.280531  | 2.132575  |
| 18 | 17 | 0 | -2.973011 | -0.629730 | -0.696009 |
| 19 | 15 | 0 | 1.463516  | 0.999902  | 0.597838  |
| 20 | 17 | 0 | 1.915388  | 1.318999  | -1.307330 |
| 21 | 17 | 0 | 3.114166  | 0.215289  | 1.386470  |
| 22 | 17 | 0 | 1.261212  | 2.772078  | 1.485380  |
| 23 | 1  | 0 | 0.117667  | -0.159488 | 2.986832  |

BA10.log

Input orientation:

| Center<br>Number | Atomic<br>Number | Atomic<br>Type | Coordinates (Angstroms) |           |           |
|------------------|------------------|----------------|-------------------------|-----------|-----------|
|                  |                  |                | X                       | Y         | Z         |
| 1                | 6                | 0              | 3.093425                | 2.871405  | -1.497100 |
| 2                | 6                | 0              | 1.830548                | 2.288646  | -1.471118 |
| 3                | 6                | 0              | 1.338297                | 1.718622  | -0.294217 |
| 4                | 6                | 0              | 2.124973                | 1.761862  | 0.856337  |
| 5                | 6                | 0              | 3.384818                | 2.353528  | 0.834465  |
| 6                | 6                | 0              | 3.874017                | 2.906627  | -0.343921 |
| 7                | 1                | 0              | 3.464788                | 3.307861  | -2.417888 |
| 8                | 1                | 0              | 1.219364                | 2.282981  | -2.365701 |
| 9                | 1                | 0              | 1.745831                | 1.330587  | 1.776914  |
| 10               | 1                | 0              | 3.983667                | 2.377608  | 1.738291  |
| 11               | 1                | 0              | 4.855282                | 3.367698  | -0.364724 |
| 12               | 6                | 0              | -0.308748               | -0.144835 | -1.033087 |
| 13               | 8                | 0              | 0.173872                | 0.005658  | -2.348086 |
| 14               | 15               | 0              | -3.772571               | 0.532325  | 1.273966  |
| 15               | 17               | 0              | -5.475358               | 0.106720  | 0.139181  |
| 16               | 17               | 0              | -3.448938               | 2.509987  | 0.691655  |
| 17               | 8                | 0              | -2.639816               | -0.223006 | 0.370902  |
| 18               | 15               | 0              | -2.146122               | -0.337384 | -1.179478 |
| 19               | 8                | 0              | -2.289572               | -1.905844 | -1.458767 |
| 20               | 1                | 0              | -3.064818               | -2.182311 | -1.975251 |
| 21               | 8                | 0              | -2.830764               | 0.567651  | -2.109797 |
| 22               | 6                | 0              | -0.061252               | 1.151680  | -0.230461 |
| 23               | 1                | 0              | -0.750301               | 1.903756  | -0.632722 |
| 24               | 1                | 0              | -0.344605               | 0.979986  | 0.810649  |
| 25               | 15               | 0              | 3.237166                | -1.846424 | 0.452843  |
| 26               | 17               | 0              | 3.953653                | -0.920881 | 2.156649  |
| 27               | 17               | 0              | 3.983832                | -0.578622 | -1.013106 |
| 28               | 8                | 0              | 1.695735                | -1.216000 | 0.560752  |
| 29               | 15               | 0              | 0.457957                | -1.691846 | -0.350802 |
| 30               | 8                | 0              | 0.849873                | -2.586539 | -1.459288 |
| 31               | 1                | 0              | 0.366350                | -0.866275 | -2.726687 |

|    |   |   |           |           |          |
|----|---|---|-----------|-----------|----------|
| 32 | 8 | 0 | -0.487823 | -2.281172 | 0.780267 |
| 33 | 1 | 0 | -1.248815 | -2.785151 | 0.449475 |

BA2.log

Input orientation:

| Center<br>Number | Atomic<br>Number | Atomic<br>Type | Coordinates (Angstroms) |           |           |
|------------------|------------------|----------------|-------------------------|-----------|-----------|
|                  |                  |                | X                       | Y         | Z         |
| 1                | 6                | 0              | 3.517445                | -2.244323 | -1.484155 |
| 2                | 6                | 0              | 2.338279                | -1.516427 | -1.557320 |
| 3                | 6                | 0              | 1.789169                | -0.983869 | -0.388925 |
| 4                | 6                | 0              | 2.421710                | -1.176250 | 0.844842  |
| 5                | 6                | 0              | 3.600380                | -1.905871 | 0.903989  |
| 6                | 6                | 0              | 4.148305                | -2.439827 | -0.258581 |
| 7                | 1                | 0              | 3.945407                | -2.656327 | -2.389653 |
| 8                | 1                | 0              | 1.849147                | -1.360611 | -2.509461 |
| 9                | 1                | 0              | 2.020741                | -0.759288 | 1.762937  |
| 10               | 1                | 0              | 4.087911                | -2.053079 | 1.859432  |
| 11               | 1                | 0              | 5.068599                | -3.009422 | -0.209193 |
| 12               | 6                | 0              | 0.501997                | -0.206965 | -0.485458 |
| 13               | 8                | 0              | 0.037099                | -0.177525 | -1.763044 |
| 14               | 17               | 0              | -0.108290               | 1.242666  | 2.078026  |
| 15               | 15               | 0              | 0.885754                | 1.640632  | 0.141544  |
| 16               | 17               | 0              | 1.914545                | 1.977670  | -1.731158 |
| 17               | 17               | 0              | -0.388404               | 3.184346  | -0.206868 |
| 18               | 17               | 0              | 2.580381                | 2.127543  | 1.163640  |
| 19               | 1                | 0              | -0.784933               | 0.329865  | -1.904679 |
| 20               | 6                | 0              | -4.265338               | 1.129768  | 0.459412  |
| 21               | 1                | 0              | -5.101198               | 1.525350  | -0.123511 |
| 22               | 1                | 0              | -4.610279               | 0.589037  | 1.340185  |
| 23               | 1                | 0              | -3.532781               | 1.902092  | 0.692555  |
| 24               | 16               | 0              | -3.478189               | -0.033093 | -0.593741 |
| 25               | 8                | 0              | -2.212938               | -0.461393 | 0.544173  |
| 26               | 8                | 0              | -4.228394               | -1.232173 | -0.804481 |
| 27               | 8                | 0              | -2.742697               | 0.575911  | -1.673480 |
| 28               | 15               | 0              | -0.851228               | -1.216032 | 0.445074  |
| 29               | 17               | 0              | -0.489001               | -2.007476 | 2.217605  |
| 30               | 17               | 0              | -1.081377               | -2.775984 | -0.771142 |

BA3.log

Input orientation:

| Center<br>Number | Atomic<br>Number | Atomic<br>Type | Coordinates (Angstroms) |          |           |
|------------------|------------------|----------------|-------------------------|----------|-----------|
|                  |                  |                | X                       | Y        | Z         |
| 1                | 6                | 0              | -3.739625               | 1.844633 | 0.694026  |
| 2                | 6                | 0              | -2.501055               | 1.220761 | 0.705728  |
| 3                | 6                | 0              | -1.908585               | 0.833689 | -0.503736 |
| 4                | 6                | 0              | -2.574972               | 1.060101 | -1.714442 |
| 5                | 6                | 0              | -3.814661               | 1.682439 | -1.709820 |

|    |    |   |           |           |           |
|----|----|---|-----------|-----------|-----------|
| 6  | 6  | 0 | -4.398295 | 2.075620  | -0.510052 |
| 7  | 1  | 0 | -4.189702 | 2.147265  | 1.631046  |
| 8  | 1  | 0 | -2.025173 | 1.044914  | 1.662243  |
| 9  | 1  | 0 | -2.124576 | 0.759355  | -2.650160 |
| 10 | 1  | 0 | -4.322792 | 1.858307  | -2.649879 |
| 11 | 1  | 0 | -5.366584 | 2.561649  | -0.512202 |
| 12 | 6  | 0 | -0.573013 | 0.134951  | -0.573112 |
| 13 | 8  | 0 | -0.198587 | -0.042657 | -1.852614 |
| 14 | 17 | 0 | 0.259654  | -0.096674 | 2.295163  |
| 15 | 15 | 0 | 0.780770  | 1.064096  | 0.499845  |
| 16 | 17 | 0 | 1.275761  | 2.275398  | -1.209558 |
| 17 | 17 | 0 | 0.419361  | 2.761447  | 1.563957  |
| 18 | 8  | 0 | 2.238512  | 0.391368  | 0.612078  |
| 19 | 16 | 0 | 3.333730  | -0.308787 | -0.466061 |
| 20 | 8  | 0 | 3.915544  | -1.359128 | 0.317308  |
| 21 | 8  | 0 | 2.541291  | -0.639028 | -1.632839 |
| 22 | 6  | 0 | 4.475500  | 0.999160  | -0.746469 |
| 23 | 1  | 0 | 5.296056  | 0.547476  | -1.308673 |
| 24 | 1  | 0 | 3.978590  | 1.776779  | -1.321677 |
| 25 | 1  | 0 | 4.810821  | 1.349946  | 0.229403  |
| 26 | 15 | 0 | -0.939638 | -1.729544 | 0.048624  |
| 27 | 17 | 0 | -1.768325 | -2.526803 | -1.575401 |
| 28 | 17 | 0 | -2.294304 | -1.988149 | 1.475514  |
| 29 | 17 | 0 | 0.639569  | -2.873885 | 0.465790  |
| 30 | 1  | 0 | 0.731537  | -0.310106 | -1.993758 |

BA4.log

Input orientation:

| Center<br>Number | Atomic<br>Number | Atomic<br>Type | Coordinates (Angstroms) |           |           |
|------------------|------------------|----------------|-------------------------|-----------|-----------|
|                  |                  |                | X                       | Y         | Z         |
| 1                | 6                | 0              | 4.331510                | -1.116621 | 0.636125  |
| 2                | 6                | 0              | 3.003656                | -0.718942 | 0.702156  |
| 3                | 6                | 0              | 2.301557                | -0.460903 | -0.480102 |
| 4                | 6                | 0              | 2.928566                | -0.590942 | -1.720223 |
| 5                | 6                | 0              | 4.257704                | -0.987779 | -1.772495 |
| 6                | 6                | 0              | 4.958293                | -1.252289 | -0.599252 |
| 7                | 1                | 0              | 4.872244                | -1.322181 | 1.551387  |
| 8                | 1                | 0              | 2.539028                | -0.612707 | 1.677664  |
| 9                | 1                | 0              | 2.380525                | -0.392519 | -2.631755 |
| 10               | 1                | 0              | 4.744163                | -1.094098 | -2.734344 |
| 11               | 1                | 0              | 5.994187                | -1.566323 | -0.645992 |
| 12               | 6                | 0              | 0.849131                | -0.051734 | -0.443157 |
| 13               | 8                | 0              | 0.328003                | 0.027355  | -1.699369 |
| 14               | 17               | 0              | -0.358031               | 0.036508  | 2.285594  |
| 15               | 15               | 0              | -0.163073               | -1.365099 | 0.597409  |
| 16               | 17               | 0              | 0.160738                | -2.764579 | -1.014335 |
| 17               | 17               | 0              | 0.553456                | -2.755711 | 1.910079  |
| 18               | 8                | 0              | -1.746773               | -1.259960 | 0.430812  |
| 19               | 16               | 0              | -2.976305               | -1.654459 | -0.684779 |
| 20               | 8                | 0              | -4.079585               | -0.900359 | -0.159073 |
| 21               | 8                | 0              | -2.454368               | -1.364196 | -1.994050 |

|    |    |   |           |           |           |
|----|----|---|-----------|-----------|-----------|
| 22 | 6  | 0 | -3.177517 | -3.376081 | -0.374121 |
| 23 | 1  | 0 | -4.074114 | -3.668962 | -0.924356 |
| 24 | 1  | 0 | -2.299432 | -3.900438 | -0.744350 |
| 25 | 1  | 0 | -3.317716 | -3.496883 | 0.699899  |
| 26 | 6  | 0 | -2.274460 | 4.053341  | -0.665233 |
| 27 | 1  | 0 | -3.314639 | 4.147068  | -0.986316 |
| 28 | 1  | 0 | -2.034722 | 4.762752  | 0.125995  |
| 29 | 1  | 0 | -1.589057 | 4.115152  | -1.509951 |
| 30 | 16 | 0 | -2.136756 | 2.441113  | 0.017857  |
| 31 | 8  | 0 | -0.472272 | 2.541457  | 0.512240  |
| 32 | 8  | 0 | -2.851674 | 2.285216  | 1.244323  |
| 33 | 8  | 0 | -2.126562 | 1.397422  | -0.978712 |
| 34 | 15 | 0 | 0.866592  | 1.800080  | 0.180625  |
| 35 | 17 | 0 | 1.649686  | 2.718373  | -1.405840 |
| 36 | 17 | 0 | 2.077200  | 2.245541  | 1.680284  |
| 37 | 1  | 0 | -0.626402 | 0.225367  | -1.733776 |

BA5.log

Input orientation:

| Center<br>Number | Atomic<br>Number | Atomic<br>Type | Coordinates (Angstroms) |           |           |
|------------------|------------------|----------------|-------------------------|-----------|-----------|
|                  |                  |                | X                       | Y         | Z         |
| 1                | 6                | 0              | 0.634136                | 2.772896  | 0.717197  |
| 2                | 6                | 0              | 0.280951                | 1.431665  | 0.619934  |
| 3                | 6                | 0              | 0.050376                | 0.853146  | -0.632773 |
| 4                | 6                | 0              | 0.198295                | 1.627625  | -1.782263 |
| 5                | 6                | 0              | 0.559525                | 2.967929  | -1.679742 |
| 6                | 6                | 0              | 0.775317                | 3.544392  | -0.433145 |
| 7                | 1                | 0              | 0.804112                | 3.209880  | 1.694460  |
| 8                | 1                | 0              | 0.191513                | 0.845537  | 1.528188  |
| 9                | 1                | 0              | 0.021670                | 1.201936  | -2.762451 |
| 10               | 1                | 0              | 0.667898                | 3.559674  | -2.581174 |
| 11               | 1                | 0              | 1.053010                | 4.589165  | -0.356722 |
| 12               | 6                | 0              | -0.282242               | -0.629184 | -0.778995 |
| 13               | 8                | 0              | -0.848694               | -0.957956 | -2.022686 |
| 14               | 15               | 0              | -3.513523               | 1.039988  | 0.750638  |
| 15               | 17               | 0              | -5.106700               | -0.291994 | 0.944468  |
| 16               | 17               | 0              | -3.367195               | 1.088468  | -1.329578 |
| 17               | 8                | 0              | -2.259699               | 0.041932  | 1.084825  |
| 18               | 15               | 0              | -1.505560               | -1.258401 | 0.468733  |
| 19               | 8                | 0              | -0.501790               | -1.594860 | 1.671596  |
| 20               | 1                | 0              | -0.906146               | -1.779887 | 2.536735  |
| 21               | 8                | 0              | -2.402506               | -2.324616 | 0.016429  |
| 22               | 17               | 0              | 5.030678                | -0.630762 | 0.005908  |
| 23               | 17               | 0              | 3.383179                | 0.843779  | 2.279413  |
| 24               | 15               | 0              | 3.253187                | 0.431445  | 0.253091  |
| 25               | 15               | 0              | 1.332242                | -1.577184 | -0.712427 |
| 26               | 8                | 0              | 2.233717                | -0.875517 | 0.426982  |
| 27               | 8                | 0              | 1.105329                | -3.037744 | -0.146429 |
| 28               | 1                | 0              | 0.874538                | -3.096944 | 0.794893  |
| 29               | 8                | 0              | 1.914419                | -1.554399 | -2.066316 |
| 30               | 1                | 0              | -0.143977               | -0.984190 | -2.688658 |



-----  
BA6.log

Input orientation:

| Center<br>Number | Atomic<br>Number | Atomic<br>Type | Coordinates (Angstroms) |           |           |
|------------------|------------------|----------------|-------------------------|-----------|-----------|
|                  |                  |                | X                       | Y         | Z         |
| 1                | 6                | 0              | -3.948959               | -1.748188 | 1.111412  |
| 2                | 6                | 0              | -2.560171               | -1.794221 | 1.074076  |
| 3                | 6                | 0              | -1.880142               | -1.590769 | -0.127964 |
| 4                | 6                | 0              | -2.603881               | -1.360280 | -1.299339 |
| 5                | 6                | 0              | -3.992964               | -1.305463 | -1.257829 |
| 6                | 6                | 0              | -4.666785               | -1.493464 | -0.053623 |
| 7                | 1                | 0              | -4.468266               | -1.904329 | 2.049489  |
| 8                | 1                | 0              | -1.997879               | -1.977916 | 1.984103  |
| 9                | 1                | 0              | -2.086376               | -1.226545 | -2.241742 |
| 10               | 1                | 0              | -4.549741               | -1.120387 | -2.168809 |
| 11               | 1                | 0              | -5.749290               | -1.449556 | -0.025713 |
| 12               | 6                | 0              | 0.292508                | -0.381797 | -0.661944 |
| 13               | 8                | 0              | 0.217597                | -0.356216 | -1.991509 |
| 14               | 17               | 0              | 0.551419                | 0.484241  | 2.076035  |
| 15               | 6                | 0              | -0.367516               | -1.657073 | -0.117853 |
| 16               | 1                | 0              | -0.042785               | -1.868727 | 0.897557  |
| 17               | 1                | 0              | -0.015706               | -2.464036 | -0.771338 |
| 18               | 15               | 0              | -0.446247               | 1.240200  | 0.238770  |
| 19               | 17               | 0              | -2.161710               | 1.457380  | 1.315395  |
| 20               | 17               | 0              | -1.482129               | 1.854476  | -1.549296 |
| 21               | 17               | 0              | 0.676814                | 2.929343  | 0.260868  |
| 22               | 15               | 0              | 2.258002                | -0.612099 | -0.237193 |
| 23               | 17               | 0              | 3.380130                | 0.957150  | 0.230839  |
| 24               | 17               | 0              | 3.014225                | -1.294771 | -1.944518 |
| 25               | 17               | 0              | 2.631766                | -2.015660 | 1.116447  |
| 26               | 1                | 0              | 0.487355                | 0.480850  | -2.410792 |

-----  
BA7.log

Input orientation:

| Center<br>Number | Atomic<br>Number | Atomic<br>Type | Coordinates (Angstroms) |          |           |
|------------------|------------------|----------------|-------------------------|----------|-----------|
|                  |                  |                | X                       | Y        | Z         |
| 1                | 6                | 0              | -3.429124               | 2.646030 | -0.903210 |
| 2                | 6                | 0              | -2.123856               | 2.278344 | -0.597469 |
| 3                | 6                | 0              | -1.807953               | 1.770079 | 0.664479  |
| 4                | 6                | 0              | -2.809512               | 1.697388 | 1.636546  |
| 5                | 6                | 0              | -4.112872               | 2.073903 | 1.334763  |
| 6                | 6                | 0              | -4.428208               | 2.534289 | 0.059297  |
| 7                | 1                | 0              | -3.661148               | 3.026779 | -1.890821 |
| 8                | 1                | 0              | -1.354784               | 2.401462 | -1.349746 |
| 9                | 1                | 0              | -2.565338               | 1.340474 | 2.630666  |
| 10               | 1                | 0              | -4.881225               | 2.005730 | 2.095799  |
| 11               | 1                | 0              | -5.446390               | 2.819103 | -0.179373 |

|    |    |   |           |           |           |
|----|----|---|-----------|-----------|-----------|
| 12 | 6  | 0 | 0.064349  | -0.024064 | 0.423493  |
| 13 | 8  | 0 | 0.821958  | -0.666996 | 1.369721  |
| 14 | 17 | 0 | -1.204061 | -0.516608 | -2.210816 |
| 15 | 6  | 0 | -0.405702 | 1.330491  | 1.020010  |
| 16 | 1  | 0 | 0.320215  | 2.110192  | 0.766412  |
| 17 | 1  | 0 | -0.324394 | 1.177707  | 2.098084  |
| 18 | 15 | 0 | -1.471276 | -1.134888 | -0.119124 |
| 19 | 17 | 0 | -3.492532 | -0.970651 | -0.418300 |
| 20 | 17 | 0 | -1.836896 | -1.510597 | 1.974795  |
| 21 | 17 | 0 | -0.813863 | -3.017144 | -0.488417 |
| 22 | 1  | 0 | 1.085568  | -1.581223 | 1.159473  |
| 23 | 15 | 0 | 1.408775  | 0.338776  | -0.897980 |
| 24 | 17 | 0 | 2.054120  | -1.316724 | -1.775078 |
| 25 | 17 | 0 | 1.134879  | 1.738152  | -2.265907 |
| 26 | 8  | 0 | 2.567914  | 0.941541  | -0.044362 |
| 27 | 16 | 0 | 3.717425  | 0.360554  | 1.144609  |
| 28 | 8  | 0 | 3.316842  | 1.024280  | 2.346972  |
| 29 | 8  | 0 | 3.688457  | -1.070378 | 1.029739  |
| 30 | 6  | 0 | 5.133201  | 1.081958  | 0.391984  |
| 31 | 1  | 0 | 5.240658  | 0.631612  | -0.594082 |
| 32 | 1  | 0 | 4.969749  | 2.157787  | 0.347890  |
| 33 | 1  | 0 | 5.971874  | 0.829994  | 1.044653  |

BA8.log

Input orientation:

| Center<br>Number | Atomic<br>Number | Atomic<br>Type | Coordinates (Angstroms) |           |           |
|------------------|------------------|----------------|-------------------------|-----------|-----------|
|                  |                  |                | X                       | Y         | Z         |
| 1                | 6                | 0              | 4.614273                | -0.619640 | 0.207701  |
| 2                | 6                | 0              | 3.611134                | -0.010970 | 0.952043  |
| 3                | 6                | 0              | 2.673037                | 0.818784  | 0.332126  |
| 4                | 6                | 0              | 2.788461                | 1.069099  | -1.036815 |
| 5                | 6                | 0              | 3.788916                | 0.457047  | -1.783072 |
| 6                | 6                | 0              | 4.696923                | -0.396980 | -1.163986 |
| 7                | 1                | 0              | 5.330321                | -1.266889 | 0.700090  |
| 8                | 1                | 0              | 3.548483                | -0.182973 | 2.020662  |
| 9                | 1                | 0              | 2.106429                | 1.748146  | -1.532437 |
| 10               | 1                | 0              | 3.861758                | 0.654099  | -2.846082 |
| 11               | 1                | 0              | 5.475652                | -0.875532 | -1.746246 |
| 12               | 6                | 0              | 0.180269                | 0.806969  | 1.083266  |
| 13               | 8                | 0              | -0.359606               | 0.747707  | 2.323111  |
| 14               | 17               | 0              | 0.985263                | -1.740765 | 2.126053  |
| 15               | 6                | 0              | 1.587260                | 1.454232  | 1.171447  |
| 16               | 1                | 0              | 1.838560                | 1.372753  | 2.230894  |
| 17               | 1                | 0              | 1.532006                | 2.526188  | 0.956936  |
| 18               | 15               | 0              | 0.218301                | -0.979787 | 0.260644  |
| 19               | 17               | 0              | 1.539842                | -2.192764 | -0.737864 |
| 20               | 17               | 0              | -0.315733               | -0.122667 | -1.692931 |
| 21               | 8                | 0              | -1.212977               | -1.633432 | 0.533200  |
| 22               | 16               | 0              | -2.507908               | -2.386743 | -0.279746 |
| 23               | 8                | 0              | -3.141965               | -1.388972 | -1.095137 |
| 24               | 8                | 0              | -3.215881               | -2.975125 | 0.822097  |

|    |    |   |           |           |           |
|----|----|---|-----------|-----------|-----------|
| 25 | 6  | 0 | -1.658199 | -3.595632 | -1.238455 |
| 26 | 1  | 0 | -1.027732 | -4.175755 | -0.564835 |
| 27 | 1  | 0 | -2.441110 | -4.220259 | -1.674932 |
| 28 | 1  | 0 | -1.097423 | -3.087416 | -2.022494 |
| 29 | 15 | 0 | -0.980286 | 2.123683  | 0.171178  |
| 30 | 17 | 0 | -2.817371 | 1.559820  | -0.304252 |
| 31 | 17 | 0 | -0.224743 | 3.139079  | -1.360278 |
| 32 | 17 | 0 | -1.195408 | 3.494741  | 1.601936  |
| 33 | 1  | 0 | -1.181395 | 0.229278  | 2.394130  |

BA9.log

Input orientation:

| Center<br>Number | Atomic<br>Number | Atomic<br>Type | Coordinates (Angstroms) |           |           |
|------------------|------------------|----------------|-------------------------|-----------|-----------|
|                  |                  |                | X                       | Y         | Z         |
| 1                | 6                | 0              | 1.248085                | 4.565820  | 0.068832  |
| 2                | 6                | 0              | 0.864827                | 3.580562  | 0.971294  |
| 3                | 6                | 0              | -0.076237               | 2.614330  | 0.607122  |
| 4                | 6                | 0              | -0.657334               | 2.674960  | -0.661553 |
| 5                | 6                | 0              | -0.269708               | 3.656792  | -1.566885 |
| 6                | 6                | 0              | 0.689955                | 4.598271  | -1.206283 |
| 7                | 1                | 0              | 1.983852                | 5.305941  | 0.360739  |
| 8                | 1                | 0              | 1.301315                | 3.554022  | 1.963452  |
| 9                | 1                | 0              | -1.412562               | 1.953606  | -0.949769 |
| 10               | 1                | 0              | -0.720189               | 3.686378  | -2.551945 |
| 11               | 1                | 0              | 0.994186                | 5.361783  | -1.912769 |
| 12               | 6                | 0              | 0.041319                | 0.109685  | 1.325487  |
| 13               | 8                | 0              | 0.387737                | -0.472487 | 2.518578  |
| 14               | 17               | 0              | 2.766523                | 0.885703  | 1.781069  |
| 15               | 6                | 0              | -0.457878               | 1.551808  | 1.612523  |
| 16               | 1                | 0              | -0.021530               | 1.787520  | 2.584563  |
| 17               | 1                | 0              | -1.543434               | 1.552414  | 1.755260  |
| 18               | 15               | 0              | 1.605367                | 0.115391  | 0.123366  |
| 19               | 17               | 0              | 2.587832                | 1.432056  | -1.113951 |
| 20               | 17               | 0              | 0.383555                | -0.449897 | -1.604521 |
| 21               | 8                | 0              | 2.313349                | -1.317292 | 0.270789  |
| 22               | 16               | 0              | 2.824132                | -2.628152 | -0.678054 |
| 23               | 8                | 0              | 1.648631                | -3.300780 | -1.158841 |
| 24               | 8                | 0              | 3.712703                | -3.298770 | 0.230532  |
| 25               | 6                | 0              | 3.705346                | -1.812030 | -1.966455 |
| 26               | 1                | 0              | 4.449135                | -1.162518 | -1.505558 |
| 27               | 1                | 0              | 4.185602                | -2.609342 | -2.538310 |
| 28               | 1                | 0              | 2.992661                | -1.273357 | -2.589933 |
| 29               | 15               | 0              | -1.467515               | -0.915485 | 0.758128  |
| 30               | 17               | 0              | -1.010684               | -2.787424 | 0.298816  |
| 31               | 17               | 0              | -2.569340               | -1.045964 | 2.414002  |
| 32               | 1                | 0              | 0.813744                | -1.343584 | 2.439965  |
| 33               | 8                | 0              | -2.318377               | -0.254328 | -0.353346 |
| 34               | 16               | 0              | -4.001056               | 0.228672  | -0.679000 |
| 35               | 8                | 0              | -3.809407               | 1.096994  | -1.797604 |
| 36               | 8                | 0              | -4.487996               | 0.711515  | 0.577933  |
| 37               | 6                | 0              | -4.637576               | -1.349997 | -1.125496 |

|    |   |   |           |           |           |
|----|---|---|-----------|-----------|-----------|
| 38 | 1 | 0 | -5.660300 | -1.168365 | -1.465232 |
| 39 | 1 | 0 | -4.010740 | -1.735284 | -1.929221 |
| 40 | 1 | 0 | -4.621520 | -1.979004 | -0.235123 |

TS1.log

Input orientation:

| Center<br>Number | Atomic<br>Number | Atomic<br>Type | Coordinates (Angstroms) |           |           |
|------------------|------------------|----------------|-------------------------|-----------|-----------|
|                  |                  |                | X                       | Y         | Z         |
| 1                | 6                | 0              | -3.566268               | 0.308882  | 1.176606  |
| 2                | 6                | 0              | -2.337666               | 0.909455  | 0.946336  |
| 3                | 6                | 0              | -1.604464               | 0.554854  | -0.190175 |
| 4                | 6                | 0              | -2.091155               | -0.395017 | -1.089187 |
| 5                | 6                | 0              | -3.328844               | -0.982967 | -0.853763 |
| 6                | 6                | 0              | -4.061238               | -0.636659 | 0.277865  |
| 7                | 1                | 0              | -4.139262               | 0.574702  | 2.056661  |
| 8                | 1                | 0              | -1.942167               | 1.642524  | 1.639671  |
| 9                | 1                | 0              | -1.514261               | -0.653051 | -1.969089 |
| 10               | 1                | 0              | -3.719887               | -1.711020 | -1.554105 |
| 11               | 1                | 0              | -5.022211               | -1.103083 | 0.461305  |
| 12               | 6                | 0              | -0.294742               | 1.190378  | -0.447442 |
| 13               | 8                | 0              | 0.474076                | 0.771607  | -1.502952 |
| 14               | 8                | 0              | -0.232561               | 2.467794  | -0.091206 |
| 15               | 1                | 0              | 0.576980                | 2.886593  | -0.426755 |
| 16               | 15               | 0              | 1.197359                | -0.003248 | -0.011666 |
| 17               | 17               | 0              | 3.074070                | 0.637260  | -0.477480 |
| 18               | 17               | 0              | 1.758155                | -0.700679 | 2.054371  |
| 19               | 17               | 0              | 1.024262                | -1.889358 | -0.764993 |

TS10.log

Input orientation:

| Center<br>Number | Atomic<br>Number | Atomic<br>Type | Coordinates (Angstroms) |           |           |
|------------------|------------------|----------------|-------------------------|-----------|-----------|
|                  |                  |                | X                       | Y         | Z         |
| 1                | 6                | 0              | 4.228943                | -1.375761 | 0.728028  |
| 2                | 6                | 0              | 2.868868                | -1.122588 | 0.697344  |
| 3                | 6                | 0              | 2.237791                | -0.879707 | -0.534454 |
| 4                | 6                | 0              | 2.982062                | -0.871749 | -1.727063 |
| 5                | 6                | 0              | 4.341910                | -1.122809 | -1.678061 |
| 6                | 6                | 0              | 4.963894                | -1.374297 | -0.455793 |
| 7                | 1                | 0              | 4.717481                | -1.561375 | 1.675914  |
| 8                | 1                | 0              | 2.327204                | -1.084868 | 1.634972  |
| 9                | 1                | 0              | 2.489670                | -0.684301 | -2.672783 |
| 10               | 1                | 0              | 4.919434                | -1.125294 | -2.593812 |
| 11               | 1                | 0              | 6.029457                | -1.568737 | -0.426053 |
| 12               | 6                | 0              | 0.812218                | -0.570131 | -0.612676 |
| 13               | 8                | 0              | 0.328832                | -0.373470 | -1.799983 |
| 14               | 17               | 0              | -0.213179               | 0.002764  | 2.176308  |
| 15               | 15               | 0              | -0.363222               | -1.509573 | 0.621742  |

|    |    |   |           |           |           |
|----|----|---|-----------|-----------|-----------|
| 16 | 17 | 0 | -0.349858 | -3.060773 | -0.909129 |
| 17 | 17 | 0 | 0.179598  | -2.918340 | 1.988874  |
| 18 | 8  | 0 | -1.919754 | -1.185484 | 0.508521  |
| 19 | 16 | 0 | -3.132717 | -1.190656 | -0.690123 |
| 20 | 8  | 0 | -4.087709 | -0.260582 | -0.166531 |
| 21 | 8  | 0 | -2.434441 | -0.917594 | -1.927087 |
| 22 | 6  | 0 | -3.740254 | -2.839072 | -0.577514 |
| 23 | 1  | 0 | -4.658391 | -2.849004 | -1.168707 |
| 24 | 1  | 0 | -2.997886 | -3.519099 | -0.986972 |
| 25 | 1  | 0 | -3.948398 | -3.030136 | 0.475277  |
| 26 | 6  | 0 | -1.928800 | 4.226706  | -0.499731 |
| 27 | 1  | 0 | -2.987979 | 4.271210  | -0.761372 |
| 28 | 1  | 0 | -1.665993 | 5.000554  | 0.220620  |
| 29 | 1  | 0 | -1.300150 | 4.257881  | -1.388691 |
| 30 | 16 | 0 | -1.693528 | 2.670917  | 0.280428  |
| 31 | 8  | 0 | -0.058533 | 2.783596  | 0.649318  |
| 32 | 8  | 0 | -2.382093 | 2.595485  | 1.537664  |
| 33 | 8  | 0 | -1.754314 | 1.566446  | -0.657112 |
| 34 | 15 | 0 | 1.016444  | 1.707221  | 0.059098  |
| 35 | 17 | 0 | 1.554533  | 2.536231  | -1.719230 |
| 36 | 17 | 0 | 2.573078  | 2.111194  | 1.269607  |
| 37 | 1  | 0 | -0.649805 | -0.314699 | -1.893512 |

TS11.log

Input orientation:

| Center<br>Number | Atomic<br>Number | Atomic<br>Type | Coordinates (Angstroms) |           |           |
|------------------|------------------|----------------|-------------------------|-----------|-----------|
|                  |                  |                | X                       | Y         | Z         |
| 1                | 6                | 0              | -4.446803               | 0.468607  | 0.079660  |
| 2                | 6                | 0              | -3.168594               | 1.005221  | -0.028931 |
| 3                | 6                | 0              | -2.133673               | 0.218864  | -0.534828 |
| 4                | 6                | 0              | -2.371385               | -1.101161 | -0.918334 |
| 5                | 6                | 0              | -3.652034               | -1.632533 | -0.800992 |
| 6                | 6                | 0              | -4.689087               | -0.848604 | -0.302869 |
| 7                | 1                | 0              | -5.254257               | 1.080002  | 0.465337  |
| 8                | 1                | 0              | -2.976189               | 2.027469  | 0.274179  |
| 9                | 1                | 0              | -1.559573               | -1.702034 | -1.313624 |
| 10               | 1                | 0              | -3.839215               | -2.656465 | -1.102751 |
| 11               | 1                | 0              | -5.686612               | -1.263276 | -0.213243 |
| 12               | 6                | 0              | -0.728274               | 0.750970  | -0.614901 |
| 13               | 8                | 0              | 0.097622                | 0.154190  | -1.422725 |
| 14               | 8                | 0              | -0.685147               | 2.116008  | -0.560833 |
| 15               | 1                | 0              | 0.157940                | 2.402896  | -0.941353 |
| 16               | 15               | 0              | 1.966021                | -0.547810 | -0.898710 |
| 17               | 17               | 0              | 3.945596                | -1.346383 | -0.126048 |
| 18               | 17               | 0              | 2.568192                | 1.488935  | -0.603043 |
| 19               | 8                | 0              | 1.298910                | -0.797130 | 0.612806  |
| 20               | 15               | 0              | 0.070316                | 0.053481  | 1.231450  |
| 21               | 8                | 0              | -0.721376               | -0.976717 | 2.137304  |
| 22               | 1                | 0              | -1.336555               | -1.558523 | 1.657902  |
| 23               | 8                | 0              | 0.667901                | 0.966556  | 2.385295  |
| 24               | 1                | 0              | 1.090845                | 1.790034  | 2.089401  |

-----  
TS12.log

Input orientation:

| Center<br>Number | Atomic<br>Number | Atomic<br>Type | Coordinates (Angstroms) |           |           |
|------------------|------------------|----------------|-------------------------|-----------|-----------|
|                  |                  |                | X                       | Y         | Z         |
| 1                | 6                | 0              | 3.995680                | 0.318134  | 1.143708  |
| 2                | 6                | 0              | 2.724155                | 0.676764  | 0.716634  |
| 3                | 6                | 0              | 2.278507                | 0.247305  | -0.534449 |
| 4                | 6                | 0              | 3.097981                | -0.535135 | -1.353296 |
| 5                | 6                | 0              | 4.369497                | -0.884728 | -0.916069 |
| 6                | 6                | 0              | 4.817063                | -0.461731 | 0.331580  |
| 7                | 1                | 0              | 4.349622                | 0.657539  | 2.109807  |
| 8                | 1                | 0              | 2.100132                | 1.308992  | 1.334860  |
| 9                | 1                | 0              | 2.734315                | -0.871768 | -2.316824 |
| 10               | 1                | 0              | 5.006000                | -1.492104 | -1.548704 |
| 11               | 1                | 0              | 5.808477                | -0.737481 | 0.672022  |
| 12               | 6                | 0              | 0.906188                | 0.481815  | -1.060478 |
| 13               | 8                | 0              | 0.524353                | 0.407778  | -2.183524 |
| 14               | 17               | 0              | 0.262268                | 2.538899  | -0.174033 |
| 15               | 15               | 0              | -0.477542               | -0.285514 | 0.192615  |
| 16               | 17               | 0              | -0.308834               | -2.317716 | 0.019146  |
| 17               | 17               | 0              | -0.419236               | -0.001007 | 2.197540  |
| 18               | 8                | 0              | -1.893661               | 0.059629  | -0.313540 |
| 19               | 15               | 0              | -3.575657               | -0.019428 | 0.261931  |
| 20               | 8                | 0              | -4.114783               | 1.135637  | -0.717819 |
| 21               | 1                | 0              | -4.028041               | 2.026729  | -0.345410 |
| 22               | 8                | 0              | -4.051408               | -1.232259 | -0.684445 |
| 23               | 1                | 0              | -4.104324               | -2.081597 | -0.220190 |

-----  
TS13.log

Input orientation:

| Center<br>Number | Atomic<br>Number | Atomic<br>Type | Coordinates (Angstroms) |           |           |
|------------------|------------------|----------------|-------------------------|-----------|-----------|
|                  |                  |                | X                       | Y         | Z         |
| 1                | 6                | 0              | 4.293262                | 1.036025  | 0.883798  |
| 2                | 6                | 0              | 2.980087                | 1.046279  | 0.432821  |
| 3                | 6                | 0              | 2.529903                | 0.026382  | -0.405982 |
| 4                | 6                | 0              | 3.390483                | -0.998086 | -0.792671 |
| 5                | 6                | 0              | 4.709107                | -0.997180 | -0.345822 |
| 6                | 6                | 0              | 5.160114                | 0.015739  | 0.492963  |
| 7                | 1                | 0              | 4.644423                | 1.828761  | 1.533929  |
| 8                | 1                | 0              | 2.319852                | 1.859643  | 0.716429  |
| 9                | 1                | 0              | 3.023776                | -1.786147 | -1.439353 |
| 10               | 1                | 0              | 5.380719                | -1.790714 | -0.652296 |
| 11               | 1                | 0              | 6.185734                | 0.014195  | 0.843690  |
| 12               | 6                | 0              | 1.101254                | -0.065717 | -0.889345 |
| 13               | 8                | 0              | 0.711387                | -0.953226 | -1.639996 |
| 14               | 17               | 0              | 0.549013                | 1.740212  | -1.448536 |

|    |    |   |           |           |           |
|----|----|---|-----------|-----------|-----------|
| 15 | 15 | 0 | -3.090697 | -0.229920 | 0.779747  |
| 16 | 17 | 0 | -3.241463 | -1.481463 | -0.881660 |
| 17 | 17 | 0 | -3.984278 | 1.471772  | 0.024424  |
| 18 | 8  | 0 | -1.530366 | 0.294411  | 0.526020  |
| 19 | 15 | 0 | -0.060348 | -0.304919 | 0.775315  |
| 20 | 8  | 0 | 0.291969  | -0.021721 | 2.298626  |
| 21 | 1  | 0 | 0.637397  | 0.867397  | 2.488652  |
| 22 | 8  | 0 | -0.257349 | -1.879300 | 0.836024  |
| 23 | 1  | 0 | -0.132251 | -2.291362 | -0.038830 |

TS14.log

Input orientation:

| Center<br>Number | Atomic<br>Number | Atomic<br>Type | Coordinates (Angstroms) |           |           |
|------------------|------------------|----------------|-------------------------|-----------|-----------|
|                  |                  |                | X                       | Y         | Z         |
| 1                | 6                | 0              | 0.705030                | 2.568985  | 0.997857  |
| 2                | 6                | 0              | 0.272681                | 1.262348  | 0.800998  |
| 3                | 6                | 0              | 0.019527                | 0.800287  | -0.494186 |
| 4                | 6                | 0              | 0.203278                | 1.647132  | -1.584696 |
| 5                | 6                | 0              | 0.638323                | 2.953860  | -1.382288 |
| 6                | 6                | 0              | 0.890539                | 3.415398  | -0.094468 |
| 7                | 1                | 0              | 0.905398                | 2.921630  | 2.002835  |
| 8                | 1                | 0              | 0.148774                | 0.608442  | 1.659496  |
| 9                | 1                | 0              | 0.002642                | 1.272428  | -2.581090 |
| 10               | 1                | 0              | 0.781766                | 3.610689  | -2.232390 |
| 11               | 1                | 0              | 1.233208                | 4.431980  | 0.061018  |
| 12               | 6                | 0              | -0.425580               | -0.625666 | -0.787926 |
| 13               | 8                | 0              | -0.571069               | -0.992040 | -2.001741 |
| 14               | 15               | 0              | -3.736487               | 1.021366  | 0.475143  |
| 15               | 17               | 0              | -5.370511               | -0.279371 | 0.535269  |
| 16               | 17               | 0              | -3.392917               | 1.026850  | -1.587528 |
| 17               | 8                | 0              | -2.544866               | 0.013036  | 0.943677  |
| 18               | 15               | 0              | -1.740619               | -1.295673 | 0.373028  |
| 19               | 8                | 0              | -0.888889               | -1.674317 | 1.686454  |
| 20               | 1                | 0              | -1.411351               | -1.922188 | 2.469095  |
| 21               | 8                | 0              | -2.608345               | -2.347183 | -0.170246 |
| 22               | 17               | 0              | 5.041793                | -0.227666 | -0.856152 |
| 23               | 17               | 0              | 3.927617                | 1.005337  | 1.847981  |
| 24               | 15               | 0              | 3.277210                | 0.557128  | -0.068822 |
| 25               | 15               | 0              | 1.313396                | -1.712455 | -0.260556 |
| 26               | 8                | 0              | 2.570206                | -0.896985 | 0.340687  |
| 27               | 8                | 0              | 1.390029                | -3.089357 | 0.525580  |
| 28               | 1                | 0              | 0.955143                | -3.075379 | 1.394141  |
| 29               | 8                | 0              | 1.676449                | -2.078790 | -1.743492 |
| 30               | 1                | 0              | 0.865367                | -1.755985 | -2.259956 |

TS15.log

Input orientation:

| Center | Atomic | Atomic | Coordinates (Angstroms) |  |  |
|--------|--------|--------|-------------------------|--|--|
|--------|--------|--------|-------------------------|--|--|

| Number | Number | Type | X         | Y         | Z         |
|--------|--------|------|-----------|-----------|-----------|
| 1      | 6      | 0    | -2.934827 | -0.501706 | -1.301034 |
| 2      | 6      | 0    | -1.902888 | 0.434105  | -1.289061 |
| 3      | 6      | 0    | -1.717653 | 1.245426  | -0.170269 |
| 4      | 6      | 0    | -2.578847 | 1.142869  | 0.922484  |
| 5      | 6      | 0    | -3.617462 | 0.221987  | 0.898881  |
| 6      | 6      | 0    | -3.789467 | -0.607205 | -0.209311 |
| 7      | 1      | 0    | -3.070044 | -1.141439 | -2.165078 |
| 8      | 1      | 0    | -1.241994 | 0.534983  | -2.144584 |
| 9      | 1      | 0    | -2.428603 | 1.782291  | 1.785818  |
| 10     | 1      | 0    | -4.288491 | 0.144525  | 1.745971  |
| 11     | 1      | 0    | -4.595928 | -1.331058 | -0.222249 |
| 12     | 6      | 0    | 0.643995  | 1.681291  | 0.546202  |
| 13     | 8      | 0    | 1.526801  | 1.909645  | 1.222679  |
| 14     | 17     | 0    | 1.852769  | 0.671298  | -1.912260 |
| 15     | 6      | 0    | -0.573149 | 2.216450  | -0.127825 |
| 16     | 1      | 0    | -0.226193 | 2.507489  | -1.123564 |
| 17     | 1      | 0    | -0.795474 | 3.113919  | 0.460598  |
| 18     | 15     | 0    | 0.761526  | -0.625775 | 0.089203  |
| 19     | 17     | 0    | 0.334372  | -2.125109 | -1.243620 |
| 20     | 17     | 0    | -0.338691 | -1.458368 | 1.723872  |
| 21     | 17     | 0    | 2.637827  | -1.115652 | 0.758454  |

TS16.log

Input orientation:

| Center<br>Number | Atomic<br>Number | Atomic<br>Type | Coordinates (Angstroms) |           |           |
|------------------|------------------|----------------|-------------------------|-----------|-----------|
|                  |                  |                | X                       | Y         | Z         |
| 1                | 6                | 0              | 3.995503                | 0.649077  | 1.498700  |
| 2                | 6                | 0              | 2.816610                | 1.332189  | 1.214454  |
| 3                | 6                | 0              | 2.226314                | 1.235287  | -0.046421 |
| 4                | 6                | 0              | 2.842652                | 0.451463  | -1.025343 |
| 5                | 6                | 0              | 4.015070                | -0.240425 | -0.738164 |
| 6                | 6                | 0              | 4.594019                | -0.145046 | 0.524975  |
| 7                | 1                | 0              | 4.444480                | 0.737803  | 2.481294  |
| 8                | 1                | 0              | 2.349774                | 1.946794  | 1.977535  |
| 9                | 1                | 0              | 2.407174                | 0.382678  | -2.015236 |
| 10               | 1                | 0              | 4.481699                | -0.846491 | -1.506316 |
| 11               | 1                | 0              | 5.509267                | -0.681529 | 0.747399  |
| 12               | 6                | 0              | -0.143345               | 1.137445  | -0.886518 |
| 13               | 8                | 0              | -0.057446               | 0.362091  | -1.805507 |
| 14               | 17               | 0              | -1.660300               | 2.629838  | -1.322196 |
| 15               | 6                | 0              | 0.969630                | 2.024492  | -0.351574 |
| 16               | 1                | 0              | 0.625708                | 2.576661  | 0.525055  |
| 17               | 1                | 0              | 1.158131                | 2.742096  | -1.154212 |
| 18               | 15               | 0              | -1.193979               | 0.271103  | 0.536770  |
| 19               | 17               | 0              | -2.832825               | 1.016664  | 1.402504  |
| 20               | 17               | 0              | -0.028310               | -0.252987 | 2.094078  |
| 21               | 8                | 0              | -1.739338               | -1.073780 | -0.110841 |
| 22               | 16               | 0              | -0.923940               | -2.397417 | -0.821241 |
| 23               | 8                | 0              | 0.464607                | -2.242250 | -0.469168 |



|    |   |   |           |           |           |
|----|---|---|-----------|-----------|-----------|
| 24 | 8 | 0 | -1.345457 | -2.402640 | -2.192376 |
| 25 | 6 | 0 | -1.715247 | -3.657295 | 0.117760  |
| 26 | 1 | 0 | -2.785866 | -3.582504 | -0.066570 |
| 27 | 1 | 0 | -1.313438 | -4.602543 | -0.251542 |
| 28 | 1 | 0 | -1.462828 | -3.495876 | 1.164800  |

TS17.log

Input orientation:

| Center<br>Number | Atomic<br>Number | Atomic<br>Type | Coordinates (Angstroms) |           |           |
|------------------|------------------|----------------|-------------------------|-----------|-----------|
|                  |                  |                | X                       | Y         | Z         |
| 1                | 6                | 0              | -3.918184               | -1.759138 | 1.135790  |
| 2                | 6                | 0              | -2.541406               | -1.893224 | 1.017703  |
| 3                | 6                | 0              | -1.921763               | -1.652439 | -0.211083 |
| 4                | 6                | 0              | -2.688463               | -1.280893 | -1.319977 |
| 5                | 6                | 0              | -4.065456               | -1.136744 | -1.192611 |
| 6                | 6                | 0              | -4.679004               | -1.367952 | 0.035200  |
| 7                | 1                | 0              | -4.397700               | -1.952047 | 2.088110  |
| 8                | 1                | 0              | -1.942805               | -2.186759 | 1.872968  |
| 9                | 1                | 0              | -2.215174               | -1.118571 | -2.283166 |
| 10               | 1                | 0              | -4.656926               | -0.847711 | -2.053080 |
| 11               | 1                | 0              | -5.751973               | -1.251847 | 0.134326  |
| 12               | 6                | 0              | 0.093343                | -0.432912 | -0.780143 |
| 13               | 8                | 0              | 0.321076                | -0.349894 | -2.038221 |
| 14               | 17               | 0              | -0.045804               | 0.247145  | 2.039321  |
| 15               | 6                | 0              | -0.413866               | -1.779989 | -0.328950 |
| 16               | 1                | 0              | 0.007364                | -2.097056 | 0.623256  |
| 17               | 1                | 0              | -0.126184               | -2.488502 | -1.109264 |
| 18               | 15               | 0              | -0.622382               | 1.160694  | 0.164727  |
| 19               | 17               | 0              | -2.474828               | 1.543405  | 0.922909  |
| 20               | 17               | 0              | -1.283540               | 1.974451  | -1.749250 |
| 21               | 17               | 0              | 0.698022                | 2.680116  | 0.422333  |
| 22               | 15               | 0              | 2.376797                | -0.535878 | -0.027327 |
| 23               | 17               | 0              | 3.604565                | 0.965120  | -0.597993 |
| 24               | 17               | 0              | 2.950912                | -2.069770 | -1.215719 |
| 25               | 17               | 0              | 3.055949                | -1.074443 | 1.791345  |
| 26               | 1                | 0              | 0.481528                | 0.547937  | -2.404353 |

TS18.log

Input orientation:

| Center<br>Number | Atomic<br>Number | Atomic<br>Type | Coordinates (Angstroms) |          |           |
|------------------|------------------|----------------|-------------------------|----------|-----------|
|                  |                  |                | X                       | Y        | Z         |
| 1                | 6                | 0              | -2.722878               | 2.894339 | -1.139178 |
| 2                | 6                | 0              | -1.637044               | 2.295219 | -0.511466 |
| 3                | 6                | 0              | -1.759830               | 1.795048 | 0.787109  |
| 4                | 6                | 0              | -2.965974               | 1.959201 | 1.472393  |
| 5                | 6                | 0              | -4.047532               | 2.570157 | 0.849646  |
| 6                | 6                | 0              | -3.932127               | 3.023784 | -0.462112 |

|    |    |   |           |           |           |
|----|----|---|-----------|-----------|-----------|
| 7  | 1  | 0 | -2.620324 | 3.267803  | -2.150942 |
| 8  | 1  | 0 | -0.689490 | 2.226065  | -1.034173 |
| 9  | 1  | 0 | -3.056046 | 1.603689  | 2.492647  |
| 10 | 1  | 0 | -4.981146 | 2.687797  | 1.386578  |
| 11 | 1  | 0 | -4.779161 | 3.491173  | -0.950560 |
| 12 | 6  | 0 | -0.394286 | -0.328883 | 1.028437  |
| 13 | 8  | 0 | 0.284259  | -1.060015 | 1.820764  |
| 14 | 17 | 0 | -0.984294 | -0.763332 | -1.956339 |
| 15 | 6  | 0 | -0.609728 | 1.096837  | 1.467991  |
| 16 | 1  | 0 | 0.337132  | 1.633334  | 1.345021  |
| 17 | 1  | 0 | -0.773220 | 1.020805  | 2.549353  |
| 18 | 15 | 0 | -1.841605 | -1.178344 | -0.022933 |
| 19 | 17 | 0 | -3.664403 | -0.597656 | -0.727588 |
| 20 | 17 | 0 | -2.703607 | -1.350502 | 1.985081  |
| 21 | 17 | 0 | -1.560328 | -3.172139 | -0.186072 |
| 22 | 1  | 0 | 0.416451  | -2.007657 | 1.603537  |
| 23 | 15 | 0 | 1.577389  | -0.003074 | -0.558642 |
| 24 | 17 | 0 | 2.458878  | -1.695380 | -1.284184 |
| 25 | 17 | 0 | 1.846716  | 1.308476  | -2.100455 |
| 26 | 8  | 0 | 2.594656  | 0.536189  | 0.567702  |
| 27 | 16 | 0 | 4.228482  | 0.478470  | 0.962253  |
| 28 | 8  | 0 | 4.291234  | 1.299727  | 2.140281  |
| 29 | 8  | 0 | 4.575144  | -0.917263 | 1.031365  |
| 30 | 6  | 0 | 4.976050  | 1.265861  | -0.425017 |
| 31 | 1  | 0 | 4.811526  | 0.645900  | -1.306579 |
| 32 | 1  | 0 | 4.551817  | 2.264473  | -0.523489 |
| 33 | 1  | 0 | 6.041872  | 1.316112  | -0.191889 |

TS19.log

Input orientation:

| Center<br>Number | Atomic<br>Number | Atomic<br>Type | Coordinates (Angstroms) |           |           |
|------------------|------------------|----------------|-------------------------|-----------|-----------|
|                  |                  |                | X                       | Y         | Z         |
| 1                | 6                | 0              | 4.712777                | -0.219271 | 0.143181  |
| 2                | 6                | 0              | 3.690497                | 0.220581  | 0.975146  |
| 3                | 6                | 0              | 2.639062                | 0.979526  | 0.457053  |
| 4                | 6                | 0              | 2.646049                | 1.328375  | -0.894859 |
| 5                | 6                | 0              | 3.663180                | 0.879206  | -1.729627 |
| 6                | 6                | 0              | 4.691529                | 0.096002  | -1.213282 |
| 7                | 1                | 0              | 5.522063                | -0.811562 | 0.553258  |
| 8                | 1                | 0              | 3.704220                | -0.025781 | 2.030837  |
| 9                | 1                | 0              | 1.861222                | 1.958320  | -1.298344 |
| 10               | 1                | 0              | 3.654330                | 1.146601  | -2.779578 |
| 11               | 1                | 0              | 5.483557                | -0.255579 | -1.864049 |
| 12               | 6                | 0              | 0.258913                | 0.596071  | 1.235636  |
| 13               | 8                | 0              | -0.502966               | 0.563283  | 2.271119  |
| 14               | 17               | 0              | 1.256536                | -1.790715 | 2.091630  |
| 15               | 6                | 0              | 1.521777                | 1.415283  | 1.372802  |
| 16               | 1                | 0              | 1.805176                | 1.299873  | 2.424293  |
| 17               | 1                | 0              | 1.288272                | 2.476111  | 1.238358  |
| 18               | 15               | 0              | 0.347339                | -1.076586 | 0.233044  |
| 19               | 17               | 0              | 1.777466                | -2.093843 | -0.812477 |

|    |    |   |           |           |           |
|----|----|---|-----------|-----------|-----------|
| 20 | 17 | 0 | -0.349982 | -0.233861 | -1.625782 |
| 21 | 8  | 0 | -0.982972 | -1.874669 | 0.582910  |
| 22 | 16 | 0 | -2.308240 | -2.638041 | -0.201952 |
| 23 | 8  | 0 | -3.035938 | -1.619186 | -0.901383 |
| 24 | 8  | 0 | -2.905717 | -3.333613 | 0.901575  |
| 25 | 6  | 0 | -1.451445 | -3.729660 | -1.287400 |
| 26 | 1  | 0 | -0.774683 | -4.337136 | -0.686286 |
| 27 | 1  | 0 | -2.225280 | -4.347490 | -1.748939 |
| 28 | 1  | 0 | -0.941173 | -3.135603 | -2.045391 |
| 29 | 15 | 0 | -1.188011 | 2.154101  | 0.006265  |
| 30 | 17 | 0 | -3.090235 | 1.569751  | -0.346764 |
| 31 | 17 | 0 | -0.728675 | 3.243272  | -1.640603 |
| 32 | 17 | 0 | -1.421032 | 3.580390  | 1.442204  |
| 33 | 1  | 0 | -1.251249 | -0.071219 | 2.240620  |

TS2.log

Input orientation:

| Center<br>Number | Atomic<br>Number | Atomic<br>Type | Coordinates (Angstroms) |           |           |
|------------------|------------------|----------------|-------------------------|-----------|-----------|
|                  |                  |                | X                       | Y         | Z         |
| 1                | 6                | 0              | -4.530317               | -0.031277 | -0.841207 |
| 2                | 6                | 0              | -3.215374               | -0.241774 | -1.230357 |
| 3                | 6                | 0              | -2.273136               | -0.636377 | -0.277022 |
| 4                | 6                | 0              | -2.638784               | -0.813887 | 1.057139  |
| 5                | 6                | 0              | -3.960809               | -0.606602 | 1.435838  |
| 6                | 6                | 0              | -4.902736               | -0.212330 | 0.490729  |
| 7                | 1                | 0              | -5.266043               | 0.276948  | -1.574182 |
| 8                | 1                | 0              | -2.916527               | -0.100070 | -2.262109 |
| 9                | 1                | 0              | -1.898012               | -1.126049 | 1.783446  |
| 10               | 1                | 0              | -4.253119               | -0.752254 | 2.468680  |
| 11               | 1                | 0              | -5.931031               | -0.046022 | 0.789944  |
| 12               | 6                | 0              | -0.862135               | -0.859879 | -0.675951 |
| 13               | 8                | 0              | 0.061075                | -1.212932 | 0.252148  |
| 14               | 8                | 0              | -0.726811               | -1.332381 | -1.918035 |
| 15               | 1                | 0              | 0.186276                | -1.619867 | -2.082527 |
| 16               | 15               | 0              | 0.301051                | 0.626507  | -0.145574 |
| 17               | 17               | 0              | 0.401262                | 2.641309  | -0.998725 |
| 18               | 17               | 0              | 0.118310                | 1.193472  | 1.798704  |
| 19               | 8                | 0              | 1.883118                | 0.392755  | -0.447251 |
| 20               | 16               | 0              | 2.926843                | -0.775371 | 0.121134  |
| 21               | 8                | 0              | 2.637368                | -0.989575 | 1.519191  |
| 22               | 8                | 0              | 2.857951                | -1.883277 | -0.801310 |
| 23               | 6                | 0              | 4.407444                | 0.151015  | -0.103816 |
| 24               | 1                | 0              | 5.222668                | -0.508183 | 0.198537  |
| 25               | 1                | 0              | 4.481455                | 0.409737  | -1.159007 |
| 26               | 1                | 0              | 4.352738                | 1.032131  | 0.533440  |

TS20.log

Input orientation:

| Center<br>Number | Atomic<br>Number | Atomic<br>Type | Coordinates (Angstroms) |           |           |
|------------------|------------------|----------------|-------------------------|-----------|-----------|
|                  |                  |                | X                       | Y         | Z         |
| 1                | 6                | 0              | 0.461127                | 4.719433  | 0.217852  |
| 2                | 6                | 0              | 0.277491                | 3.675097  | 1.116175  |
| 3                | 6                | 0              | -0.443132               | 2.539387  | 0.739882  |
| 4                | 6                | 0              | -1.002188               | 2.480537  | -0.537987 |
| 5                | 6                | 0              | -0.810613               | 3.519300  | -1.441443 |
| 6                | 6                | 0              | -0.072765               | 4.637906  | -1.066016 |
| 7                | 1                | 0              | 1.024636                | 5.594504  | 0.519159  |
| 8                | 1                | 0              | 0.695706                | 3.737282  | 2.114642  |
| 9                | 1                | 0              | -1.587778               | 1.620723  | -0.839584 |
| 10               | 1                | 0              | -1.240941               | 3.453437  | -2.433647 |
| 11               | 1                | 0              | 0.077920                | 5.448228  | -1.769594 |
| 12               | 6                | 0              | 0.259001                | 0.201932  | 1.430427  |
| 13               | 8                | 0              | 0.463716                | -0.593053 | 2.411725  |
| 14               | 17               | 0              | 2.644945                | 1.371623  | 1.892238  |
| 15               | 6                | 0              | -0.602093               | 1.404403  | 1.721017  |
| 16               | 1                | 0              | -0.309439               | 1.710040  | 2.732066  |
| 17               | 1                | 0              | -1.645785               | 1.081802  | 1.806252  |
| 18               | 15               | 0              | 1.724662                | 0.403399  | 0.152799  |
| 19               | 17               | 0              | 2.443693                | 1.914421  | -1.018800 |
| 20               | 17               | 0              | 0.647136                | -0.358163 | -1.547155 |
| 21               | 8                | 0              | 2.704559                | -0.834555 | 0.341832  |
| 22               | 16               | 0              | 3.325717                | -2.168662 | -0.539727 |
| 23               | 8                | 0              | 2.206909                | -2.975201 | -0.934721 |
| 24               | 8                | 0              | 4.294494                | -2.673181 | 0.391205  |
| 25               | 6                | 0              | 4.088855                | -1.342194 | -1.894543 |
| 26               | 1                | 0              | 4.781485                | -0.604760 | -1.489616 |
| 27               | 1                | 0              | 4.625185                | -2.120604 | -2.441898 |
| 28               | 1                | 0              | 3.311796                | -0.905040 | -2.520564 |
| 29               | 15               | 0              | -1.473722               | -1.332030 | 0.399650  |
| 30               | 17               | 0              | -0.994114               | -3.199186 | -0.221268 |
| 31               | 17               | 0              | -2.626835               | -1.709180 | 2.056946  |
| 32               | 1                | 0              | 1.067663                | -1.350374 | 2.257698  |
| 33               | 8                | 0              | -2.552026               | -0.927116 | -0.743259 |
| 34               | 16               | 0              | -3.960871               | -0.013084 | -0.747400 |
| 35               | 8                | 0              | -3.953764               | 0.595243  | -2.049874 |
| 36               | 8                | 0              | -3.908888               | 0.809132  | 0.436957  |
| 37               | 6                | 0              | -5.163761               | -1.292089 | -0.629326 |
| 38               | 1                | 0              | -6.135122               | -0.801620 | -0.716610 |
| 39               | 1                | 0              | -4.991349               | -1.979556 | -1.456266 |
| 40               | 1                | 0              | -5.051149               | -1.776485 | 0.339950  |

TS21.log

Input orientation:

| Center<br>Number | Atomic<br>Number | Atomic<br>Type | Coordinates (Angstroms) |           |           |
|------------------|------------------|----------------|-------------------------|-----------|-----------|
|                  |                  |                | X                       | Y         | Z         |
| 1                | 6                | 0              | 4.709298                | -1.727454 | -0.433329 |
| 2                | 6                | 0              | 3.492252                | -1.189403 | -0.843331 |
| 3                | 6                | 0              | 3.125612                | 0.101045  | -0.460052 |

|    |    |   |           |           |           |
|----|----|---|-----------|-----------|-----------|
| 4  | 6  | 0 | 3.993494  | 0.846245  | 0.340847  |
| 5  | 6  | 0 | 5.207808  | 0.308451  | 0.754350  |
| 6  | 6  | 0 | 5.568319  | -0.980718 | 0.368409  |
| 7  | 1  | 0 | 4.985949  | -2.729769 | -0.740563 |
| 8  | 1  | 0 | 2.823302  | -1.772570 | -1.467610 |
| 9  | 1  | 0 | 3.716305  | 1.852710  | 0.636096  |
| 10 | 1  | 0 | 5.874599  | 0.897529  | 1.374078  |
| 11 | 1  | 0 | 6.516214  | -1.398871 | 0.688145  |
| 12 | 6  | 0 | 0.793107  | 0.702365  | 0.243208  |
| 13 | 8  | 0 | 0.943671  | 1.270327  | 1.310108  |
| 14 | 17 | 0 | 0.215641  | -1.248775 | 0.448180  |
| 15 | 15 | 0 | -3.572086 | -0.285788 | -0.218485 |
| 16 | 17 | 0 | -3.037290 | -0.356103 | 1.793093  |
| 17 | 17 | 0 | -3.059558 | -2.210830 | -0.798137 |
| 18 | 8  | 0 | -2.264483 | 0.506552  | -0.844601 |
| 19 | 15 | 0 | -0.987399 | 1.418359  | -0.500456 |
| 20 | 8  | 0 | -0.937721 | 2.436948  | -1.720134 |
| 21 | 1  | 0 | -0.586328 | 2.081694  | -2.554619 |
| 22 | 8  | 0 | -1.467370 | 2.333840  | 0.693087  |
| 23 | 1  | 0 | -0.821136 | 2.293496  | 1.426476  |
| 24 | 6  | 0 | 1.808109  | 0.688705  | -0.895668 |
| 25 | 1  | 0 | 1.393112  | 0.147267  | -1.747035 |
| 26 | 1  | 0 | 1.949085  | 1.738564  | -1.176568 |

TS22.log

Input orientation:

| Center<br>Number | Atomic<br>Number | Atomic<br>Type | Coordinates (Angstroms) |           |           |
|------------------|------------------|----------------|-------------------------|-----------|-----------|
|                  |                  |                | X                       | Y         | Z         |
| 1                | 6                | 0              | 3.427605                | 3.098043  | 0.106948  |
| 2                | 6                | 0              | 2.065359                | 2.876810  | -0.075189 |
| 3                | 6                | 0              | 1.389755                | 1.940452  | 0.712130  |
| 4                | 6                | 0              | 2.101239                | 1.240646  | 1.690555  |
| 5                | 6                | 0              | 3.460104                | 1.470344  | 1.880521  |
| 6                | 6                | 0              | 4.128281                | 2.395849  | 1.084120  |
| 7                | 1                | 0              | 3.939136                | 3.830922  | -0.507172 |
| 8                | 1                | 0              | 1.517583                | 3.441691  | -0.819817 |
| 9                | 1                | 0              | 1.583531                | 0.514590  | 2.309108  |
| 10               | 1                | 0              | 3.997298                | 0.925638  | 2.649170  |
| 11               | 1                | 0              | 5.187769                | 2.575321  | 1.229812  |
| 12               | 6                | 0              | -0.487862               | 1.194714  | -0.845962 |
| 13               | 8                | 0              | -0.085762               | 1.799477  | -1.911454 |
| 14               | 15               | 0              | -3.466313               | -1.097288 | 1.160717  |
| 15               | 17               | 0              | -5.283680               | -0.874898 | 0.163420  |
| 16               | 17               | 0              | -3.555736               | 0.572266  | 2.406701  |
| 17               | 8                | 0              | -2.449745               | -0.538083 | 0.001833  |
| 18               | 15               | 0              | -2.286104               | 0.771647  | -0.963089 |
| 19               | 8                | 0              | -2.387774               | -0.044112 | -2.351541 |
| 20               | 1                | 0              | -2.133332               | 0.466043  | -3.139324 |
| 21               | 8                | 0              | -3.242291               | 1.865096  | -0.750474 |
| 22               | 6                | 0              | -0.091813               | 1.712385  | 0.540053  |
| 23               | 1                | 0              | -0.633114               | 2.659518  | 0.650122  |

|    |    |   |           |           |           |
|----|----|---|-----------|-----------|-----------|
| 24 | 1  | 0 | -0.458109 | 1.029767  | 1.313448  |
| 25 | 15 | 0 | 2.838494  | -2.196006 | -0.290929 |
| 26 | 17 | 0 | 3.209827  | -2.422017 | 1.730023  |
| 27 | 17 | 0 | 4.201360  | -0.701731 | -0.742486 |
| 28 | 8  | 0 | 1.478447  | -1.242679 | -0.077871 |
| 29 | 15 | 0 | 0.412572  | -0.684595 | -1.132859 |
| 30 | 8  | 0 | 1.215434  | -0.252207 | -2.414576 |
| 31 | 1  | 0 | 0.906024  | 0.709403  | -2.542056 |
| 32 | 8  | 0 | -0.381503 | -2.025284 | -1.479819 |
| 33 | 1  | 0 | -1.237087 | -1.883929 | -1.918888 |

TS3.log

Input orientation:

| Center<br>Number | Atomic<br>Number | Atomic<br>Type | Coordinates (Angstroms) |           |           |
|------------------|------------------|----------------|-------------------------|-----------|-----------|
|                  |                  |                | X                       | Y         | Z         |
| 1                | 6                | 0              | -4.258006               | 0.220536  | -0.547568 |
| 2                | 6                | 0              | -3.062235               | 0.826054  | -0.894663 |
| 3                | 6                | 0              | -1.875152               | 0.326966  | -0.330699 |
| 4                | 6                | 0              | -1.869422               | -0.747266 | 0.560866  |
| 5                | 6                | 0              | -3.076138               | -1.331895 | 0.896011  |
| 6                | 6                | 0              | -4.263404               | -0.851579 | 0.341136  |
| 7                | 1                | 0              | -5.184181               | 0.587901  | -0.970917 |
| 8                | 1                | 0              | -3.029579               | 1.662362  | -1.582063 |
| 9                | 1                | 0              | -0.952826               | -1.110807 | 1.007507  |
| 10               | 1                | 0              | -3.093886               | -2.163748 | 1.587921  |
| 11               | 1                | 0              | -5.203339               | -1.320425 | 0.607445  |
| 12               | 6                | 0              | -0.704401               | 1.025339  | -0.765303 |
| 13               | 8                | 0              | -0.265108               | 1.879742  | -1.378109 |
| 14               | 17               | 0              | 0.507515                | 1.553514  | 1.818794  |
| 15               | 15               | 0              | 1.246813                | -0.205048 | -0.105041 |
| 16               | 17               | 0              | 1.515747                | -1.603297 | -1.682217 |
| 17               | 17               | 0              | 2.788805                | 1.048222  | -0.573148 |
| 18               | 17               | 0              | 1.984111                | -1.376464 | 1.400801  |

TS4.log

Input orientation:

| Center<br>Number | Atomic<br>Number | Atomic<br>Type | Coordinates (Angstroms) |           |           |
|------------------|------------------|----------------|-------------------------|-----------|-----------|
|                  |                  |                | X                       | Y         | Z         |
| 1                | 6                | 0              | -4.238894               | 0.669145  | 0.083015  |
| 2                | 6                | 0              | -2.882967               | 0.583809  | 0.360821  |
| 3                | 6                | 0              | -2.207346               | -0.609834 | 0.103799  |
| 4                | 6                | 0              | -2.875978               | -1.712774 | -0.429594 |
| 5                | 6                | 0              | -4.236184               | -1.617811 | -0.698496 |
| 6                | 6                | 0              | -4.914943               | -0.430151 | -0.445251 |
| 7                | 1                | 0              | -4.771082               | 1.589356  | 0.289438  |
| 8                | 1                | 0              | -2.372655               | 1.424988  | 0.814419  |
| 9                | 1                | 0              | -2.331657               | -2.626393 | -0.635055 |

|    |    |   |           |           |           |
|----|----|---|-----------|-----------|-----------|
| 10 | 1  | 0 | -4.761666 | -2.470156 | -1.111460 |
| 11 | 1  | 0 | -5.975403 | -0.358988 | -0.656415 |
| 12 | 6  | 0 | -0.752079 | -0.770269 | 0.310602  |
| 13 | 8  | 0 | -0.082225 | -1.755207 | 0.218719  |
| 14 | 17 | 0 | -0.406893 | 0.141249  | 2.471317  |
| 15 | 15 | 0 | 0.365878  | 0.766284  | -0.245788 |
| 16 | 17 | 0 | 0.408499  | 0.765962  | -2.270739 |
| 17 | 17 | 0 | 0.147063  | 2.690598  | 0.245007  |
| 18 | 8  | 0 | 1.847032  | 0.448277  | 0.212571  |
| 19 | 16 | 0 | 2.928752  | -0.852047 | -0.008061 |
| 20 | 8  | 0 | 2.881170  | -1.595473 | 1.218798  |
| 21 | 8  | 0 | 2.575440  | -1.471224 | -1.257920 |
| 22 | 6  | 0 | 4.378987  | 0.135935  | -0.136900 |
| 23 | 1  | 0 | 5.207782  | -0.563853 | -0.256784 |
| 24 | 1  | 0 | 4.262409  | 0.772512  | -1.012932 |
| 25 | 1  | 0 | 4.471798  | 0.709000  | 0.784295  |

TS5.log

Input orientation:

| Center<br>Number | Atomic<br>Number | Atomic<br>Type | Coordinates (Angstroms) |           |           |
|------------------|------------------|----------------|-------------------------|-----------|-----------|
|                  |                  |                | X                       | Y         | Z         |
| 1                | 6                | 0              | -3.108547               | -2.158216 | 0.993653  |
| 2                | 6                | 0              | -1.805404               | -1.739548 | 0.761918  |
| 3                | 6                | 0              | -1.541532               | -0.880603 | -0.305805 |
| 4                | 6                | 0              | -2.565364               | -0.443290 | -1.141455 |
| 5                | 6                | 0              | -3.865785               | -0.881306 | -0.911477 |
| 6                | 6                | 0              | -4.138119               | -1.731879 | 0.155518  |
| 7                | 1                | 0              | -3.321539               | -2.819587 | 1.824778  |
| 8                | 1                | 0              | -0.993962               | -2.072262 | 1.400353  |
| 9                | 1                | 0              | -2.346869               | 0.228577  | -1.963132 |
| 10               | 1                | 0              | -4.665554               | -0.553536 | -1.564588 |
| 11               | 1                | 0              | -5.153684               | -2.063938 | 0.336670  |
| 12               | 6                | 0              | -0.142405               | -0.432534 | -0.540312 |
| 13               | 8                | 0              | 0.054485                | 0.519801  | -1.606187 |
| 14               | 8                | 0              | 0.672570                | -1.567349 | -0.609383 |
| 15               | 16               | 0              | 2.282167                | -1.571643 | -0.300812 |
| 16               | 8                | 0              | 2.734546                | -0.203322 | -0.490180 |
| 17               | 8                | 0              | 2.794525                | -2.615101 | -1.154177 |
| 18               | 6                | 0              | 2.369830                | -2.045162 | 1.411004  |
| 19               | 1                | 0              | 3.047957                | -2.895553 | 1.468583  |
| 20               | 1                | 0              | 2.755563                | -1.191468 | 1.964328  |
| 21               | 1                | 0              | 1.368730                | -2.318019 | 1.743525  |
| 22               | 15               | 0              | 0.395216                | 1.242585  | -0.140024 |
| 23               | 17               | 0              | -1.262083               | 2.359408  | 0.191253  |
| 24               | 17               | 0              | 1.161952                | 1.262455  | 1.858747  |
| 25               | 17               | 0              | 1.739679                | 2.593323  | -0.872086 |

TS6.log

Input orientation:

| Center<br>Number | Atomic<br>Number | Atomic<br>Type | Coordinates (Angstroms) |           |           |
|------------------|------------------|----------------|-------------------------|-----------|-----------|
|                  |                  |                | X                       | Y         | Z         |
| 1                | 6                | 0              | 4.465634                | -0.089026 | 0.451479  |
| 2                | 6                | 0              | 3.141691                | 0.323848  | 0.507927  |
| 3                | 6                | 0              | 2.260203                | -0.063777 | -0.502977 |
| 4                | 6                | 0              | 2.683515                | -0.864545 | -1.557008 |
| 5                | 6                | 0              | 4.016630                | -1.260321 | -1.614836 |
| 6                | 6                | 0              | 4.904224                | -0.874893 | -0.613456 |
| 7                | 1                | 0              | 5.155805                | 0.202729  | 1.234281  |
| 8                | 1                | 0              | 2.783917                | 0.937444  | 1.328756  |
| 9                | 1                | 0              | 1.974332                | -1.179456 | -2.313870 |
| 10               | 1                | 0              | 4.361057                | -1.873713 | -2.438899 |
| 11               | 1                | 0              | 5.939150                | -1.193474 | -0.658525 |
| 12               | 6                | 0              | 0.821333                | 0.366868  | -0.437397 |
| 13               | 8                | 0              | -0.085320               | -0.170888 | -1.263766 |
| 14               | 8                | 0              | 0.856894                | 1.780356  | -0.312229 |
| 15               | 16               | 0              | -0.524599               | 2.633376  | -0.183197 |
| 16               | 8                | 0              | -1.354675               | 1.910809  | 0.769218  |
| 17               | 8                | 0              | -1.057950               | 2.885465  | -1.504766 |
| 18               | 6                | 0              | 0.137426                | 4.103317  | 0.518485  |
| 19               | 1                | 0              | -0.707424               | 4.782603  | 0.642443  |
| 20               | 1                | 0              | 0.585933                | 3.845863  | 1.476616  |
| 21               | 1                | 0              | 0.866981                | 4.511288  | -0.180035 |
| 22               | 15               | 0              | -0.174250               | -0.670155 | 0.724621  |
| 23               | 17               | 0              | 0.493613                | -2.551857 | 0.493531  |
| 24               | 17               | 0              | -0.021810               | -0.414716 | 2.772765  |
| 25               | 8                | 0              | -1.765961               | -0.741511 | 0.665482  |
| 26               | 16               | 0              | -2.855295               | -1.215775 | -0.533818 |
| 27               | 8                | 0              | -2.207763               | -2.224040 | -1.332563 |
| 28               | 8                | 0              | -4.011297               | -1.557043 | 0.253246  |
| 29               | 6                | 0              | -3.110678               | 0.289084  | -1.409724 |
| 30               | 1                | 0              | -3.929091               | 0.076430  | -2.101267 |
| 31               | 1                | 0              | -3.397042               | 1.046783  | -0.681534 |
| 32               | 1                | 0              | -2.191356               | 0.532840  | -1.936083 |

TS7.log

Input orientation:

| Center<br>Number | Atomic<br>Number | Atomic<br>Type | Coordinates (Angstroms) |          |           |
|------------------|------------------|----------------|-------------------------|----------|-----------|
|                  |                  |                | X                       | Y        | Z         |
| 1                | 6                | 0              | 1.670980                | 3.558819 | -0.822409 |
| 2                | 6                | 0              | 1.089799                | 2.378289 | -1.243764 |
| 3                | 6                | 0              | 0.390803                | 1.581535 | -0.315292 |
| 4                | 6                | 0              | 0.297017                | 1.976838 | 1.033439  |
| 5                | 6                | 0              | 0.882847                | 3.162023 | 1.436219  |
| 6                | 6                | 0              | 1.568662                | 3.949756 | 0.512856  |
| 7                | 1                | 0              | 2.200932                | 4.179392 | -1.533617 |
| 8                | 1                | 0              | 1.154723                | 2.071323 | -2.279695 |
| 9                | 1                | 0              | -0.193352               | 1.364020 | 1.779505  |
| 10               | 1                | 0              | 0.814913                | 3.467403 | 2.472229  |



|    |    |   |           |           |           |
|----|----|---|-----------|-----------|-----------|
| 11 | 1  | 0 | 2.028144  | 4.875927  | 0.837598  |
| 12 | 6  | 0 | -0.173092 | 0.330729  | -0.787948 |
| 13 | 8  | 0 | -0.041159 | 0.079627  | -2.054928 |
| 14 | 17 | 0 | -0.874975 | -1.275487 | 1.670791  |
| 15 | 15 | 0 | -1.858128 | -0.227193 | 0.023932  |
| 16 | 17 | 0 | -2.767540 | 0.954433  | -1.554580 |
| 17 | 17 | 0 | -2.658509 | -1.945425 | -0.669928 |
| 18 | 17 | 0 | -2.953478 | 0.804650  | 1.395791  |
| 19 | 15 | 0 | 1.600600  | -1.097731 | -0.008183 |
| 20 | 17 | 0 | 2.493228  | -0.526950 | 1.717059  |
| 21 | 17 | 0 | 2.995324  | -0.629486 | -1.407779 |
| 22 | 17 | 0 | 1.654658  | -3.122258 | 0.047516  |
| 23 | 1  | 0 | -0.438297 | -0.745980 | -2.390811 |

TS8.log

Input orientation:

| Center<br>Number | Atomic<br>Number | Atomic<br>Type | Coordinates (Angstroms) |           |           |
|------------------|------------------|----------------|-------------------------|-----------|-----------|
|                  |                  |                | X                       | Y         | Z         |
| 1                | 6                | 0              | 3.448017                | -2.613417 | -1.182604 |
| 2                | 6                | 0              | 2.449505                | -1.701837 | -1.468903 |
| 3                | 6                | 0              | 1.935934                | -0.896089 | -0.434251 |
| 4                | 6                | 0              | 2.414310                | -1.033153 | 0.882718  |
| 5                | 6                | 0              | 3.411176                | -1.952126 | 1.150487  |
| 6                | 6                | 0              | 3.927410                | -2.738619 | 0.121328  |
| 7                | 1                | 0              | 3.855988                | -3.228130 | -1.974794 |
| 8                | 1                | 0              | 2.074339                | -1.591805 | -2.478231 |
| 9                | 1                | 0              | 1.997694                | -0.463743 | 1.704790  |
| 10               | 1                | 0              | 3.777767                | -2.065616 | 2.162360  |
| 11               | 1                | 0              | 4.708274                | -3.458024 | 0.337932  |
| 12               | 6                | 0              | 0.861089                | 0.020594  | -0.760218 |
| 13               | 8                | 0              | 0.419659                | 0.000514  | -1.971102 |
| 14               | 17               | 0              | -0.327361               | 1.076522  | 1.824070  |
| 15               | 15               | 0              | 0.900977                | 1.761263  | 0.141391  |
| 16               | 17               | 0              | 2.190470                | 2.315517  | -1.512277 |
| 17               | 17               | 0              | -0.441252               | 3.198161  | -0.308506 |
| 18               | 17               | 0              | 2.348711                | 2.310293  | 1.458543  |
| 19               | 1                | 0              | -0.313278               | 0.605400  | -2.204161 |
| 20               | 6                | 0              | -3.963956               | 1.177937  | 0.915222  |
| 21               | 1                | 0              | -4.598983               | 1.915297  | 0.420017  |
| 22               | 1                | 0              | -4.538872               | 0.562749  | 1.606718  |
| 23               | 1                | 0              | -3.108368               | 1.648361  | 1.396725  |
| 24               | 16               | 0              | -3.368884               | 0.126445  | -0.360508 |
| 25               | 8                | 0              | -2.510286               | -0.973838 | 0.558101  |
| 26               | 8                | 0              | -4.430302               | -0.618538 | -0.979803 |
| 27               | 8                | 0              | -2.367881               | 0.771729  | -1.189571 |
| 28               | 15               | 0              | -0.952794               | -1.357317 | 0.226097  |
| 29               | 17               | 0              | -0.543506               | -2.446990 | 1.876019  |
| 30               | 17               | 0              | -1.148271               | -2.768089 | -1.238220 |

TS9.log

Input orientation:

| Center<br>Number | Atomic<br>Number | Atomic<br>Type | Coordinates (Angstroms) |           |           |
|------------------|------------------|----------------|-------------------------|-----------|-----------|
|                  |                  |                | X                       | Y         | Z         |
| 1                | 6                | 0              | -3.513601               | 2.266649  | 0.589831  |
| 2                | 6                | 0              | -2.272139               | 1.657138  | 0.595725  |
| 3                | 6                | 0              | -1.760501               | 1.112469  | -0.597175 |
| 4                | 6                | 0              | -2.517820               | 1.174669  | -1.784185 |
| 5                | 6                | 0              | -3.758783               | 1.783019  | -1.770785 |
| 6                | 6                | 0              | -4.256878               | 2.328014  | -0.587505 |
| 7                | 1                | 0              | -3.905445               | 2.687876  | 1.506575  |
| 8                | 1                | 0              | -1.733617               | 1.598281  | 1.532124  |
| 9                | 1                | 0              | -2.121296               | 0.762136  | -2.702748 |
| 10               | 1                | 0              | -4.338507               | 1.836439  | -2.683513 |
| 11               | 1                | 0              | -5.230772               | 2.803124  | -0.583083 |
| 12               | 6                | 0              | -0.469913               | 0.441615  | -0.662340 |
| 13               | 8                | 0              | -0.095477               | 0.043382  | -1.840667 |
| 14               | 17               | 0              | 0.204900                | -0.019517 | 2.261242  |
| 15               | 15               | 0              | 0.952928                | 1.046934  | 0.515470  |
| 16               | 17               | 0              | 1.681265                | 2.200799  | -1.170282 |
| 17               | 17               | 0              | 0.899126                | 2.766904  | 1.606724  |
| 18               | 8                | 0              | 2.226549                | 0.074654  | 0.575176  |
| 19               | 16               | 0              | 3.313469                | -0.661796 | -0.501842 |
| 20               | 8                | 0              | 3.716415                | -1.828898 | 0.224270  |
| 21               | 8                | 0              | 2.558053                | -0.800455 | -1.730549 |
| 22               | 6                | 0              | 4.616147                | 0.516898  | -0.596214 |
| 23               | 1                | 0              | 5.428855                | 0.004022  | -1.115526 |
| 24               | 1                | 0              | 4.268344                | 1.381731  | -1.155746 |
| 25               | 1                | 0              | 4.894934                | 0.762521  | 0.428688  |
| 26               | 15               | 0              | -1.147195               | -1.688888 | 0.156683  |
| 27               | 17               | 0              | -1.999344               | -2.441626 | -1.523120 |
| 28               | 17               | 0              | -2.678777               | -1.694305 | 1.476442  |
| 29               | 17               | 0              | 0.085476                | -3.179150 | 0.763285  |
| 30               | 1                | 0              | 0.801688                | -0.359059 | -1.917367 |

benzidronic acid.log

Input orientation:

| Center<br>Number | Atomic<br>Number | Atomic<br>Type | Coordinates (Angstroms) |           |           |
|------------------|------------------|----------------|-------------------------|-----------|-----------|
|                  |                  |                | X                       | Y         | Z         |
| 1                | 6                | 0              | -3.698092               | 0.865877  | -0.027653 |
| 2                | 6                | 0              | -2.496603               | 0.951633  | 0.678757  |
| 3                | 6                | 0              | -1.661202               | -0.164287 | 0.811747  |
| 4                | 6                | 0              | -2.072280               | -1.381644 | 0.256049  |
| 5                | 6                | 0              | -3.273582               | -1.471260 | -0.444584 |
| 6                | 6                | 0              | -4.085282               | -0.346091 | -0.596521 |
| 7                | 1                | 0              | -4.330755               | 1.743038  | -0.122391 |
| 8                | 1                | 0              | -2.208055               | 1.894481  | 1.139832  |
| 9                | 1                | 0              | -1.453379               | -2.266695 | 0.379964  |
| 10               | 1                | 0              | -3.578658               | -2.422967 | -0.868962 |

|    |    |   |           |           |           |
|----|----|---|-----------|-----------|-----------|
| 11 | 1  | 0 | -5.019897 | -0.417904 | -1.144043 |
| 12 | 6  | 0 | 0.937481  | 0.096914  | 0.736235  |
| 13 | 8  | 0 | 1.965610  | 0.284125  | 1.697325  |
| 14 | 6  | 0 | -0.357267 | -0.045802 | 1.566088  |
| 15 | 1  | 0 | -0.388964 | 0.838058  | 2.212264  |
| 16 | 1  | 0 | -0.210852 | -0.918710 | 2.210156  |
| 17 | 15 | 0 | 0.988741  | 1.578189  | -0.381209 |
| 18 | 8  | 0 | 2.317684  | 1.667264  | -1.046378 |
| 19 | 15 | 0 | 1.348544  | -1.388985 | -0.285421 |
| 20 | 1  | 0 | 2.840235  | 0.250798  | 1.275455  |
| 21 | 8  | 0 | 0.593174  | -1.491584 | -1.563846 |
| 22 | 8  | 0 | 2.941820  | -1.322518 | -0.458319 |
| 23 | 1  | 0 | 3.229283  | -0.742960 | -1.186931 |
| 24 | 8  | 0 | 1.169643  | -2.560234 | 0.773249  |
| 25 | 1  | 0 | 1.348314  | -3.455017 | 0.433342  |
| 26 | 8  | 0 | -0.183374 | 1.493229  | -1.456779 |
| 27 | 1  | 0 | -1.091814 | 1.379237  | -1.117635 |
| 28 | 8  | 0 | 0.724290  | 2.839985  | 0.557337  |
| 29 | 1  | 0 | -0.185699 | 2.963519  | 0.880404  |

benzilCOCl\_DMSO.log

Input orientation:

| Center<br>Number | Atomic<br>Number | Atomic<br>Type | Coordinates (Angstroms) |           |           |
|------------------|------------------|----------------|-------------------------|-----------|-----------|
|                  |                  |                | X                       | Y         | Z         |
| 1                | 6                | 0              | -5.515485               | 0.587400  | -0.933434 |
| 2                | 6                | 0              | -4.263078               | 0.016748  | -1.146087 |
| 3                | 6                | 0              | -3.467285               | -0.353728 | -0.064032 |
| 4                | 6                | 0              | -3.934563               | -0.146355 | 1.234953  |
| 5                | 6                | 0              | -5.184297               | 0.426565  | 1.447770  |
| 6                | 6                | 0              | -5.976831               | 0.795043  | 0.363153  |
| 7                | 1                | 0              | -6.129141               | 0.868933  | -1.781632 |
| 8                | 1                | 0              | -3.901363               | -0.144119 | -2.156385 |
| 9                | 1                | 0              | -3.321419               | -0.438466 | 2.082336  |
| 10               | 1                | 0              | -5.539735               | 0.582976  | 2.459888  |
| 11               | 1                | 0              | -6.951490               | 1.239964  | 0.529398  |
| 12               | 6                | 0              | -1.008617               | -0.027369 | 0.147960  |
| 13               | 8                | 0              | -0.217546               | -0.163744 | 1.010227  |
| 14               | 17               | 0              | -0.974965               | 1.505766  | -0.831649 |
| 15               | 6                | 0              | -2.101293               | -0.966944 | -0.283786 |
| 16               | 1                | 0              | -1.947196               | -1.193046 | -1.341129 |
| 17               | 1                | 0              | -1.975602               | -1.879279 | 0.301905  |

benzilCOOH\_DMSO.log

Input orientation:

| Center<br>Number | Atomic<br>Number | Atomic<br>Type | Coordinates (Angstroms) |           |          |
|------------------|------------------|----------------|-------------------------|-----------|----------|
|                  |                  |                | X                       | Y         | Z        |
| 1                | 6                | 0              | 4.455424                | -1.850291 | 0.571383 |

|    |   |   |           |           |           |
|----|---|---|-----------|-----------|-----------|
| 2  | 6 | 0 | 3.167311  | -1.417633 | 0.278621  |
| 3  | 6 | 0 | 2.962779  | -0.292483 | -0.525531 |
| 4  | 6 | 0 | 4.070417  | 0.391192  | -1.030292 |
| 5  | 6 | 0 | 5.362274  | -0.040693 | -0.735603 |
| 6  | 6 | 0 | 5.556409  | -1.161241 | 0.064905  |
| 7  | 1 | 0 | 4.601915  | -2.725929 | 1.193649  |
| 8  | 1 | 0 | 2.309993  | -1.953312 | 0.674788  |
| 9  | 1 | 0 | 3.918594  | 1.263817  | -1.658297 |
| 10 | 1 | 0 | 6.213623  | 0.497382  | -1.136775 |
| 11 | 1 | 0 | 6.560764  | -1.499492 | 0.292845  |
| 12 | 6 | 0 | 0.946538  | 1.006991  | 0.333050  |
| 13 | 8 | 0 | 1.789719  | 1.651124  | 1.154152  |
| 14 | 6 | 0 | 1.562663  | 0.197349  | -0.796175 |
| 15 | 1 | 0 | 0.881151  | -0.630296 | -0.994954 |
| 16 | 1 | 0 | 1.548881  | 0.853974  | -1.672504 |
| 17 | 8 | 0 | -0.238966 | 1.119624  | 0.490057  |
| 18 | 1 | 0 | 2.709661  | 1.446410  | 0.926692  |

Cl2POPOH2\_DMSO.log

Input orientation:

| Center<br>Number | Atomic<br>Number | Atomic<br>Type | Coordinates (Angstroms) |           |           |
|------------------|------------------|----------------|-------------------------|-----------|-----------|
|                  |                  |                | X                       | Y         | Z         |
| 1                | 15               | 0              | 3.550232                | -0.134435 | 0.115841  |
| 2                | 17               | 0              | 3.277650                | 0.880513  | 1.939505  |
| 3                | 17               | 0              | 4.264158                | 1.460711  | -1.028080 |
| 4                | 8                | 0              | 2.017966                | -0.095396 | -0.426242 |
| 5                | 15               | 0              | 0.897019                | -1.366305 | -0.463711 |
| 6                | 8                | 0              | 1.790588                | -2.476375 | -1.254467 |
| 7                | 1                | 0              | 1.576141                | -2.528205 | -2.196602 |
| 8                | 8                | 0              | 1.214288                | -2.005372 | 1.005018  |
| 9                | 1                | 0              | 0.587920                | -1.721941 | 1.686163  |

fenidronic acid.log

Input orientation:

| Center<br>Number | Atomic<br>Number | Atomic<br>Type | Coordinates (Angstroms) |           |           |
|------------------|------------------|----------------|-------------------------|-----------|-----------|
|                  |                  |                | X                       | Y         | Z         |
| 1                | 6                | 0              | 3.498342                | -0.036835 | 1.033268  |
| 2                | 6                | 0              | 2.134507                | -0.136262 | 1.294452  |
| 3                | 6                | 0              | 1.212144                | 0.042218  | 0.263560  |
| 4                | 6                | 0              | 1.668966                | 0.315416  | -1.030885 |
| 5                | 6                | 0              | 3.032575                | 0.415132  | -1.282480 |
| 6                | 6                | 0              | 3.951642                | 0.239097  | -0.252093 |
| 7                | 1                | 0              | 4.206302                | -0.176402 | 1.841643  |
| 8                | 1                | 0              | 1.792613                | -0.351327 | 2.297451  |
| 9                | 1                | 0              | 0.965585                | 0.458307  | -1.842675 |
| 10               | 1                | 0              | 3.373843                | 0.632100  | -2.287610 |
| 11               | 1                | 0              | 5.013876                | 0.317861  | -0.450872 |

|    |    |   |           |           |           |
|----|----|---|-----------|-----------|-----------|
| 12 | 6  | 0 | -0.276886 | -0.076354 | 0.557006  |
| 13 | 8  | 0 | -0.466143 | -0.239223 | 1.951508  |
| 14 | 15 | 0 | -0.906620 | -1.628293 | -0.243385 |
| 15 | 15 | 0 | -1.214780 | 1.463365  | 0.114238  |
| 16 | 1  | 0 | -1.411903 | -0.190937 | 2.158727  |
| 17 | 8  | 0 | -0.303986 | 2.703039  | 0.528337  |
| 18 | 8  | 0 | -1.271548 | 1.397393  | -1.470238 |
| 19 | 8  | 0 | -0.277898 | -2.835909 | 0.346241  |
| 20 | 8  | 0 | -0.747309 | -1.508764 | -1.824088 |
| 21 | 8  | 0 | -2.505857 | 1.536814  | 0.840270  |
| 22 | 8  | 0 | -2.469325 | -1.446237 | -0.023531 |
| 23 | 1  | 0 | -1.732204 | 2.123600  | -1.920391 |
| 24 | 1  | 0 | 0.057881  | -1.909843 | -2.187221 |
| 25 | 1  | 0 | -3.028332 | -2.194207 | -0.287116 |
| 26 | 1  | 0 | 0.503035  | 2.850596  | 0.010931  |

H2O\_DMSO.log

Input orientation:

| Center<br>Number | Atomic<br>Number | Atomic<br>Type | Coordinates (Angstroms) |          |           |
|------------------|------------------|----------------|-------------------------|----------|-----------|
|                  |                  |                | X                       | Y        | Z         |
| 1                | 8                | 0              | 2.600991                | 1.751266 | -1.996357 |
| 2                | 1                | 0              | 3.427239                | 2.227507 | -2.126652 |
| 3                | 1                | 0              | 2.872958                | 0.860685 | -1.752702 |

H2O\_H2O.log

Input orientation:

| Center<br>Number | Atomic<br>Number | Atomic<br>Type | Coordinates (Angstroms) |          |          |
|------------------|------------------|----------------|-------------------------|----------|----------|
|                  |                  |                | X                       | Y        | Z        |
| 1                | 8                | 0              | -2.273089               | 0.619975 | 1.483643 |
| 2                | 1                | 0              | -2.887575               | 1.360226 | 1.522537 |
| 3                | 1                | 0              | -1.402711               | 1.031136 | 1.505246 |

HCl\_DMSO.log

Input orientation:

| Center<br>Number | Atomic<br>Number | Atomic<br>Type | Coordinates (Angstroms) |          |           |
|------------------|------------------|----------------|-------------------------|----------|-----------|
|                  |                  |                | X                       | Y        | Z         |
| 1                | 17               | 0              | 0.000000                | 0.000000 | 0.071667  |
| 2                | 1                | 0              | 0.000000                | 0.000000 | -1.218333 |

HCl\_H2O.log

Input orientation:

| Center<br>Number | Atomic<br>Number | Atomic<br>Type | Coordinates (Angstroms) |          |          |
|------------------|------------------|----------------|-------------------------|----------|----------|
|                  |                  |                | X                       | Y        | Z        |
| 1                | 17               | 0              | -2.267850               | 0.643549 | 1.484882 |
| 2                | 1                | 0              | -3.557850               | 0.643549 | 1.484882 |

MSA\_H2O.log

Input orientation:

| Center<br>Number | Atomic<br>Number | Atomic<br>Type | Coordinates (Angstroms) |           |           |
|------------------|------------------|----------------|-------------------------|-----------|-----------|
|                  |                  |                | X                       | Y         | Z         |
| 1                | 8                | 0              | -0.518241               | -0.751862 | 1.240635  |
| 2                | 8                | 0              | -0.516448               | -0.756669 | -1.238542 |
| 3                | 8                | 0              | -0.570994               | 1.401562  | -0.003060 |
| 4                | 16               | 0              | -0.089714               | -0.125999 | 0.000133  |
| 5                | 6                | 0              | 1.649435                | 0.141755  | 0.000698  |
| 6                | 1                | 0              | 1.908687                | 0.694363  | 0.902260  |
| 7                | 1                | 0              | 2.108572                | -0.846984 | 0.002191  |
| 8                | 1                | 0              | 1.909578                | 0.692029  | -0.902044 |
| 9                | 1                | 0              | -1.542564               | 1.481801  | -0.000984 |

PCI2POH2\_DMSO.log

Input orientation:

| Center<br>Number | Atomic<br>Number | Atomic<br>Type | Coordinates (Angstroms) |           |           |
|------------------|------------------|----------------|-------------------------|-----------|-----------|
|                  |                  |                | X                       | Y         | Z         |
| 1                | 15               | 0              | -0.708798               | -0.154538 | -0.553427 |
| 2                | 17               | 0              | -1.515499               | 1.726091  | -0.061307 |
| 3                | 17               | 0              | -2.184246               | -1.362364 | 0.299201  |
| 4                | 8                | 0              | 0.374929                | -0.287617 | 0.651133  |
| 5                | 15               | 0              | 2.056925                | -0.099346 | 0.561250  |
| 6                | 8                | 0              | 2.369913                | -1.144293 | -0.649548 |
| 7                | 1                | 0              | 2.686814                | -2.001720 | -0.332287 |
| 8                | 8                | 0              | 2.096893                | 1.207610  | -0.416740 |
| 9                | 1                | 0              | 2.220229                | 2.038449  | 0.063986  |

PCI2SO2Me\_H2O.log

Input orientation:

| Center<br>Number | Atomic<br>Number | Atomic<br>Type | Coordinates (Angstroms) |           |           |
|------------------|------------------|----------------|-------------------------|-----------|-----------|
|                  |                  |                | X                       | Y         | Z         |
| 1                | 15               | 0              | 1.034434                | -0.106614 | 0.658763  |
| 2                | 17               | 0              | 2.276450                | -1.453582 | -0.285459 |
| 3                | 17               | 0              | 1.798570                | 1.670467  | -0.098368 |
| 4                | 8                | 0              | -0.222597               | -0.303466 | -0.440963 |

|    |    |   |           |           |           |
|----|----|---|-----------|-----------|-----------|
| 5  | 16 | 0 | -1.777504 | 0.098147  | -0.107578 |
| 6  | 8  | 0 | -1.728244 | 1.190909  | 0.843337  |
| 7  | 8  | 0 | -2.384905 | 0.302341  | -1.398505 |
| 8  | 6  | 0 | -2.368584 | -1.374452 | 0.655989  |
| 9  | 1  | 0 | -3.419587 | -1.202613 | 0.891786  |
| 10 | 1  | 0 | -2.250090 | -2.190165 | -0.055859 |
| 11 | 1  | 0 | -1.784637 | -1.536969 | 1.562047  |

-----

PCI3\_H2O.log

Input orientation:

| Center<br>Number | Atomic<br>Number | Atomic<br>Type | Coordinates (Angstroms) |           |           |
|------------------|------------------|----------------|-------------------------|-----------|-----------|
|                  |                  |                | X                       | Y         | Z         |
| 1                | 15               | 0              | -0.000246               | -0.001285 | 0.759659  |
| 2                | 17               | 0              | -1.313987               | -1.272474 | -0.223493 |
| 3                | 17               | 0              | -0.443721               | 1.773287  | -0.223227 |
| 4                | 17               | 0              | 1.757995                | -0.499608 | -0.223555 |

-----

PhCOCl\_DMSO.log

Input orientation:

| Center<br>Number | Atomic<br>Number | Atomic<br>Type | Coordinates (Angstroms) |           |           |
|------------------|------------------|----------------|-------------------------|-----------|-----------|
|                  |                  |                | X                       | Y         | Z         |
| 1                | 6                | 0              | 1.928155                | -1.405978 | 0.000043  |
| 2                | 6                | 0              | 0.566378                | -1.129917 | 0.000057  |
| 3                | 6                | 0              | 0.133942                | 0.197509  | 0.000017  |
| 4                | 6                | 0              | 1.064381                | 1.243881  | -0.000045 |
| 5                | 6                | 0              | 2.421369                | 0.958892  | -0.000051 |
| 6                | 6                | 0              | 2.853310                | -0.366200 | -0.000012 |
| 7                | 1                | 0              | 2.265988                | -2.435234 | 0.000078  |
| 8                | 1                | 0              | -0.145104               | -1.945237 | 0.000101  |
| 9                | 1                | 0              | 0.716831                | 2.269845  | -0.000076 |
| 10               | 1                | 0              | 3.141220                | 1.768631  | -0.000102 |
| 11               | 1                | 0              | 3.914541                | -0.587686 | -0.000022 |
| 12               | 6                | 0              | -1.292517               | 0.591729  | 0.000029  |
| 13               | 8                | 0              | -1.723434               | 1.694251  | 0.000091  |
| 14               | 17               | 0              | -2.479772               | -0.774343 | -0.000055 |

-----

PhCOCl\_H2O.log

Input orientation:

| Center<br>Number | Atomic<br>Number | Atomic<br>Type | Coordinates (Angstroms) |           |          |
|------------------|------------------|----------------|-------------------------|-----------|----------|
|                  |                  |                | X                       | Y         | Z        |
| 1                | 6                | 0              | -1.928580               | -1.405032 | 0.000174 |
| 2                | 6                | 0              | -0.566745               | -1.131023 | 0.000382 |
| 3                | 6                | 0              | -0.132849               | 0.196272  | 0.000253 |

|    |    |   |           |           |           |
|----|----|---|-----------|-----------|-----------|
| 4  | 6  | 0 | -1.061228 | 1.244726  | -0.000036 |
| 5  | 6  | 0 | -2.418327 | 0.961321  | -0.000288 |
| 6  | 6  | 0 | -2.851812 | -0.363388 | -0.000178 |
| 7  | 1  | 0 | -2.268143 | -2.433356 | 0.000255  |
| 8  | 1  | 0 | 0.143740  | -1.947069 | 0.000587  |
| 9  | 1  | 0 | -0.711272 | 2.269711  | -0.000122 |
| 10 | 1  | 0 | -3.137192 | 1.771484  | -0.000512 |
| 11 | 1  | 0 | -3.913077 | -0.583250 | -0.000419 |
| 12 | 6  | 0 | 1.292551  | 0.583982  | 0.000145  |
| 13 | 8  | 0 | 1.724625  | 1.691013  | 0.000282  |
| 14 | 17 | 0 | 2.475934  | -0.772163 | -0.000280 |

PhCOOH\_DMSO.log

Input orientation:

| Center<br>Number | Atomic<br>Number | Atomic<br>Type | Coordinates (Angstroms) |           |           |
|------------------|------------------|----------------|-------------------------|-----------|-----------|
|                  |                  |                | X                       | Y         | Z         |
| 1                | 6                | 0              | 1.833302                | -1.233230 | 0.000021  |
| 2                | 6                | 0              | 0.443436                | -1.199292 | 0.000049  |
| 3                | 6                | 0              | -0.217277               | 0.030539  | 0.000042  |
| 4                | 6                | 0              | 0.512063                | 1.220884  | 0.000007  |
| 5                | 6                | 0              | 1.900150                | 1.181504  | -0.000025 |
| 6                | 6                | 0              | 2.560420                | -0.045519 | -0.000017 |
| 7                | 1                | 0              | 2.349344                | -2.186078 | 0.000028  |
| 8                | 1                | 0              | -0.123816               | -2.121575 | 0.000077  |
| 9                | 1                | 0              | -0.015824               | 2.167140  | 0.000003  |
| 10               | 1                | 0              | 2.467544                | 2.104728  | -0.000055 |
| 11               | 1                | 0              | 3.644172                | -0.075659 | -0.000044 |
| 12               | 6                | 0              | -1.702635               | 0.119837  | 0.000068  |
| 13               | 8                | 0              | -2.326238               | 1.152146  | 0.000008  |
| 14               | 8                | 0              | -2.303899               | -1.078590 | -0.000051 |
| 15               | 1                | 0              | -3.262981               | -0.932128 | -0.000089 |

PhCOOH\_H2O.log

Input orientation:

| Center<br>Number | Atomic<br>Number | Atomic<br>Type | Coordinates (Angstroms) |           |           |
|------------------|------------------|----------------|-------------------------|-----------|-----------|
|                  |                  |                | X                       | Y         | Z         |
| 1                | 6                | 0              | 1.830964                | -1.234255 | 0.000103  |
| 2                | 6                | 0              | 0.441642                | -1.198427 | 0.000121  |
| 3                | 6                | 0              | -0.217435               | 0.032555  | -0.000029 |
| 4                | 6                | 0              | 0.512806                | 1.222477  | -0.000220 |
| 5                | 6                | 0              | 1.900817                | 1.180787  | -0.000247 |
| 6                | 6                | 0              | 2.559259                | -0.047120 | -0.000086 |
| 7                | 1                | 0              | 2.345510                | -2.187517 | 0.000250  |
| 8                | 1                | 0              | -0.126663               | -2.119776 | 0.000282  |
| 9                | 1                | 0              | -0.010820               | 2.170859  | -0.000339 |
| 10               | 1                | 0              | 2.469476                | 2.102798  | -0.000394 |
| 11               | 1                | 0              | 3.642639                | -0.078670 | -0.000101 |



|    |   |   |           |           |           |
|----|---|---|-----------|-----------|-----------|
| 12 | 6 | 0 | -1.700539 | 0.116501  | 0.000063  |
| 13 | 8 | 0 | -2.325220 | 1.155770  | 0.000468  |
| 14 | 8 | 0 | -2.302504 | -1.078044 | -0.000344 |
| 15 | 1 | 0 | -3.263462 | -0.944660 | -0.000008 |

**Table S2.** Energy (Hartree) and entropy (cal molK<sup>-1</sup>) values obtained for the computations together with imaginary frequencies (1/s).

E, ZPE, U, H, G and S were computed at the M062X/6-311+G (d,p), while E\* at the M062X/6-311++G (3df,3pd) level of theory. G<sub>corr</sub> is the corrected Gibbs free energy value containing the standard state correction and G\* = E\* + (G – E). Solvents for those species that were used in MSA and in sulfolane as well, are indicated in parentheses.

| ID                                                         | E        | ZPE      | U        | H        | G        | S       | E*       | G <sub>corr</sub> | Imag. freq. |
|------------------------------------------------------------|----------|----------|----------|----------|----------|---------|----------|-------------------|-------------|
| PhCOOH<br>(H <sub>2</sub> O)                               | -420.78  | -420.67  | -420.66  | -420.66  | -420.71  | 89.65   | -420.81  | -420.73           |             |
| PhCOCl (H <sub>2</sub> O)                                  | -805.14  | -805.04  | -805.03  | -805.02  | -805.08  | 93.72   | -805.17  | -805.10           |             |
| PCl <sub>3</sub> (H <sub>2</sub> O)                        | -1721.99 | -1721.98 | -1721.98 | -1721.98 | -1722.02 | 79.703  | -1722.02 | -1722.05          |             |
| Cl <sub>2</sub> POSO <sub>2</sub> Me<br>(H <sub>2</sub> O) | -1925.48 | -1925.43 | -1925.42 | -1925.42 | -1925.47 | 101.684 | -1925.59 | -1925.58          |             |
| TS1                                                        | -2142.70 | -2142.58 | -2142.57 | -2142.57 | -2142.63 | 122.496 | -2142.78 | -2142.70          | -281.37     |
| adduct 1                                                   | -2142.71 | -2142.59 | -2142.57 | -2142.57 | -2142.64 | 124.597 | -2142.79 | -2142.71          |             |
| TS2                                                        | -2346.21 | -2346.04 | -2346.01 | -2346.01 | -2346.09 | 147.732 | -2346.35 | -2346.23          | -331.93     |
| adduct 2                                                   | -2346.21 | -2346.04 | -2346.02 | -2346.02 | -2346.1  | 149.239 | -2346.36 | -2346.24          |             |
| TS3                                                        | -2527.08 | -2526.98 | -2526.96 | -2526.96 | -2527.03 | 134.04  | -2527.15 | -2527.09          | -142.67     |
| adduct 3                                                   | -2527.09 | -2526.99 | -2526.97 | -2526.97 | -2527.04 | 125.944 | -2527.17 | -2527.11          |             |
| TS4                                                        | -2730.58 | -2730.43 | -2730.4  | -2730.4  | -2730.49 | 149.3   | -2730.72 | -2730.62          | -112.53     |
| adduct 4                                                   | -2730.6  | -2730.44 | -2730.41 | -2730.41 | -2730.5  | 154.915 | -2730.74 | -2730.64          |             |
| TS5                                                        | -2730.57 | -2730.41 | -2730.39 | -2730.38 | -2730.46 | 138.643 | -2730.71 | -2730.6           | -184.25     |
| adduct 5                                                   | -2730.57 | -2730.41 | -2730.39 | -2730.39 | -2730.47 | 148.826 | -2730.72 | -2730.61          |             |
| TS6                                                        | -2934.07 | -2933.86 | -2933.83 | -2933.83 | -2933.92 | 164.045 | -2934.28 | -2934.13          | -312.39     |
| adduct 6                                                   | -2934.08 | -2933.87 | -2933.84 | -2933.84 | -2933.93 | 171.325 | -2934.29 | -2934.14          |             |
| adduct 3 + H <sup>+</sup>                                  | -2527.47 | -2527.35 | -2527.33 | -2527.33 | -2527.4  | 131.682 | -2527.55 | -2527.48          |             |
| TS7                                                        | -4249.45 | -4249.32 | -4249.3  | -4249.3  | -4249.38 | 154.692 | -4249.57 | -4249.5           | -120.87     |
| bis adduct 1                                               | -4249.45 | -4249.33 | -4249.3  | -4249.3  | -4249.39 | 157.269 | -4249.58 | -4249.51          |             |
| TS8                                                        | -4452.95 | -4452.77 | -4452.74 | -4452.74 | -4452.84 | 174.158 | -4453.14 | -4453.02          | -119.22     |
| bis adduct 2                                               | -4452.96 | -4452.78 | -4452.75 | -4452.75 | -4452.85 | 184.027 | -4453.15 | -4453.04          |             |
| adduct 4 + H <sup>+</sup>                                  | -2730.98 | -2730.8  | -2730.78 | -2730.78 | -2730.86 | 150.152 | -2731.12 | -2731.01          |             |
| TS9                                                        | -4452.96 | -4452.78 | -4452.75 | -4452.75 | -4452.85 | 176.465 | -4453.14 | -4453.03          | -100.02     |
| bis adduct 3                                               | -4452.96 | -4452.78 | -4452.75 | -4452.75 | -4452.85 | 181.742 | -4453.15 | -4453.04          |             |
| TS10                                                       | -4656.46 | -4656.23 | -4656.2  | -4656.2  | -4656.31 | 201.258 | -4656.71 | -4656.55          | -109.45     |
| bis adduct 4                                               | -4656.47 | -4656.24 | -4656.2  | -4656.2  | -4656.31 | 204.291 | -4656.72 | -4656.56          |             |
| fenidronic acid<br>(H <sub>2</sub> O)                      | -1482.16 | -1481.98 | -1481.96 | -1481.96 | -1482.04 | 140.816 | -1482.29 | -1482.15          |             |

|                                      |          |          |          |          |          |         |          |          |         |
|--------------------------------------|----------|----------|----------|----------|----------|---------|----------|----------|---------|
| fenidronic acid<br>(DMSO)            | -1482.15 | -1481.96 | -1481.94 | -1481.94 | -1482.02 | 140.359 | -1482.27 | -1482.14 |         |
| H <sub>2</sub> O (H <sub>2</sub> O)  | -76.4347 | -76.4134 | -76.4101 | -76.409  | -76.4347 | 46.341  | -76.4389 | -76.4358 |         |
| HCl (H <sub>2</sub> O)               | -460.799 | -460.793 | -460.79  | -460.789 | -460.814 | 45.69   | -460.804 | -460.816 |         |
| Cl <sub>2</sub> POP(OH) <sub>2</sub> | -1830.08 | -1830.04 | -1830.03 | -1830.03 | -1830.09 | 105.587 | -1830.15 | -1830.16 |         |
| PhCOCl<br>(DMSO)                     | -805.14  | -805.041 | -805.031 | -805.03  | -805.083 | 94.612  | -805.172 | -805.109 |         |
| PhCOOH<br>(DMSO)                     | -420.78  | -420.67  | -420.66  | -420.659 | -420.709 | 89.311  | -420.816 | -420.736 |         |
| HCl (DMSO)                           | -460.80  | -460.795 | -460.795 | -460.791 | -460.816 | 45.69   | -460.806 | -460.818 |         |
| TS11                                 | -2250.83 | -2250.68 | -2250.66 | -2250.66 | -2250.73 | 140.926 | -2250.94 | -2250.83 | -163.32 |
| adduct 7                             | -2250.84 | -2250.68 | -2250.66 | -2250.66 | -2250.74 | 144.773 | -2250.95 | -2250.84 |         |
| TS12                                 | -2635.19 | -2635.05 | -2635.03 | -2635.03 | -2635.11 | 147.979 | -2635.3  | -2635.21 | -119.33 |
| adduct 8                             | -2635.21 | -2635.07 | -2635.04 | -2635.04 | -2635.13 | 154.024 | -2635.31 | -2635.23 |         |
| TS13                                 | -2635.2  | -2635.06 | -2635.03 | -2635.03 | -2635.11 | 146.382 | -2635.3  | -2635.21 | -163.32 |
| adduct 9                             | -2635.23 | -2635.09 | -2635.07 | -2635.07 | -2635.16 | 158.798 | -2635.34 | -2635.26 |         |
| adduct 9 - HCl                       | -2174.42 | -2174.29 | -2174.27 | -2174.27 | -2174.35 | 143.978 | -2174.52 | -2174.45 |         |
| TS14                                 | -4004.49 | -4004.32 | -4004.29 | -4004.29 | -4004.4  | 196.13  | -4004.67 | -4004.57 | -251.78 |
| bis adduct 5                         | -4004.53 | -4004.36 | -4004.33 | -4004.33 | -4004.43 | 190.521 | -4004.72 | -4004.61 |         |
| BnCOCl (H <sub>2</sub> O)            | -844.44  | -844.313 | -844.301 | -844.3   | -844.357 | 102.341 | -844.47  | -844.38  |         |
| BnCOCl<br>(DMSO)                     | -844.45  | -844.32  | -844.31  | -844.31  | -844.36  | 96.10   | -844.48  | -844.38  |         |
| TS15                                 | -2566.40 | -2566.26 | -2566.24 | -2566.24 | -2566.32 | 138.28  | -2566.47 | -2566.38 | -142.82 |
| adduct 10                            | -2566.41 | -2566.27 | -2566.25 | -2566.25 | -2566.33 | 136.33  | -2566.48 | -2566.40 |         |
| TS16                                 | -2769.89 | -2769.70 | -2769.68 | -2769.68 | -2769.76 | 159.12  | -2770.03 | -2769.90 | -64.34  |
| adduct 11                            | -2769.90 | -2769.72 | -2769.69 | -2769.69 | -2769.78 | 159.78  | -2770.05 | -2769.92 |         |
| adduct 10 + H <sup>+</sup>           | -2566.78 | -2566.63 | -2566.61 | -2566.61 | -2566.68 | 132.21  | -2566.86 | -2566.76 |         |
| TS17                                 | -4288.76 | -4288.60 | -4288.57 | -4288.57 | -4288.66 | 162.57  | -4288.88 | -4288.78 | -64.33  |
| bis adduct 6                         | -4288.76 | -4288.61 | -4288.58 | -4288.58 | -4288.67 | 164.65  | -4288.89 | -4288.79 |         |
| TS18                                 | -4492.25 | -4492.04 | -4492.01 | -4492.01 | -4492.11 | 186.53  | -4492.44 | -4492.30 | -124.43 |
| bis adduct 7                         | -4492.27 | -4492.06 | -4492.02 | -4492.02 | -4492.13 | 189.19  | -4492.46 | -4492.32 |         |
| adduct 11 + H <sup>+</sup>           | -2770.28 | -2770.08 | -2770.06 | -2770.06 | -2770.14 | 155.69  | -2770.43 | -2770.29 |         |
| TS19                                 | -4492.26 | -4492.05 | -4492.02 | -4492.02 | -4492.12 | 186.42  | -4492.44 | -4492.30 | -135.46 |
| bis adduct 8                         | -4492.26 | -4492.06 | -4492.02 | -4492.02 | -4492.12 | 186.22  | -4492.45 | -4492.31 |         |
| TS20                                 | -4695.76 | -4695.50 | -4695.46 | -4695.46 | -4695.58 | 211.65  | -4696.01 | -4695.83 | -145.60 |
| bis adduct 9                         | -4695.77 | -4695.51 | -4695.47 | -4695.47 | -4695.59 | 210.40  | -4696.03 | -4695.84 |         |
| TS21                                 | -2674.51 | -2674.34 | -2674.32 | -2674.32 | -2674.39 | 146.64  | -2674.61 | -2674.49 | -135.33 |
| adduct 12                            | -2674.53 | -2674.36 | -2674.34 | -2674.34 | -2674.42 | 153.19  | -2674.64 | -2674.52 |         |
| TS22                                 | -4043.80 | -4043.60 | -4043.58 | -4043.58 | -4043.65 | 167.04  | -4043.96 | -4043.82 | -274.31 |
| bis adduct 10                        | -4043.84 | -4043.64 | -4043.61 | -4043.61 | -4043.70 | 179.68  | -4044.03 | -4043.88 |         |
| benzidronic<br>acid                  | -1521.20 | -1520.99 | -1520.96 | -1520.96 | -1521.04 | 145.93  | -1521.60 | -1521.43 |         |

|                                     |         |         |         |         |         |       |         |         |  |
|-------------------------------------|---------|---------|---------|---------|---------|-------|---------|---------|--|
| MSA (H <sub>2</sub> O)              | -664.30 | -664.24 | -664.24 | -664.23 | -664.28 | 75.77 | -664.38 | -664.35 |  |
| MSA <sup>-</sup> (H <sub>2</sub> O) | -663.88 | -663.83 | -663.82 | -663.82 | -663.86 | 75.14 | -663.95 | -663.93 |  |
